# Supplementary material for: Metal-free atom transfer radical polymerization: reaching ppm catalyst loading under sunlight
Source: Research Square preprint supplement (doi:10.21203/rs.3.rs-89454/v1), 2020-10-13
Supplement: Supplementary file 1 [file 7685dae42fd1be67ee1f1b6e.pdf]

# Supplementary Information

Metal-free atom transfer radical polymerization:  
reaching ppm catalyst loading under sunlight

*Ma et al.*

## Table of Contents

|     |                                                                  |    |
|-----|------------------------------------------------------------------|----|
| 1.  | General information.....                                         | 3  |
| 2.  | The setup of photocatalytic ATRP polymerization .....            | 7  |
| 3.  | Synthesis and characterization of photocatalysts.....            | 8  |
| 4.  | Polymerization procedures .....                                  | 14 |
| 5.  | Supplementary Data .....                                         | 18 |
| 6.  | NMR spectra of precipitated polymer products .....               | 23 |
| 7.  | MALDI-TOF analysis of polymer .....                              | 26 |
| 8.  | Additional chain extension and block copolymerization data ..... | 27 |
| 9.  | NMR spectra of photocatalysts .....                              | 35 |
| 10. | Fluorescence quenching study .....                               | 39 |
| 11. | The color of PMMA products .....                                 | 42 |
| 12. | Computational detail.....                                        | 43 |
| 13. | Comparison Tables .....                                          | 59 |
| 14. | References.....                                                  | 62 |

## 1. General information

### *Monomers details*

Methyl methacrylate (MMA), Benzyl methacrylate (BnMA) and Styrene (St) were purchased from TCI chemicals. 2,2,2-trifluoroethyl methacrylate (TFEMA) was purchased from Adamas chemicals, *n*-butyl acrylate (BA) was purchased from J&K chemicals. MMA was first degassed and dried over CaH<sub>2</sub> overnight, followed by vacuum distillation; then MMA was further purified by titration with neat tri(*n*-octyl)aluminum (Aldrich Chemical) to a yellow end point<sup>1</sup> and distillation under reduced pressure. The monomer was deoxygenized by freeze–pump–thaw cycle three times, stored under a nitrogen atmosphere and sealed up. BnMA was degassed and dried over CaH<sub>2</sub>, followed by vacuum distillation. St, TFEMA and BA were purified by passing it through a plug of aluminum oxide (activated, basic) to remove the inhibitor, deoxygenized by freeze–pump–thaw cycle three times, backfilled with argon and sealed up. Subsequently, all of the purified monomers were stored under inert atmosphere at -20°C.

### *Other chemicals*

HPLC-grade dichloromethane (DCM) were first purged with argon and then dried by CaH<sub>2</sub> overnight, followed by vacuum distillation, deoxygenized by freeze–pump–thaw cycle three times, sealed up after adding activated 4 Å molecular sieves. *N,N*-dimethylacetamide (DMA, 99.8%, SuperDry, J&K Seal) were purchased from J&K and used as received. Other solvents were purified by vacuum distillation followed by three freeze–pump–thaw cycles and stored under an argon atmosphere before use. The storage life of all the monomers and solvents shall not exceed four weeks.

Ethyl  $\alpha$ -bromophenylacetate (EBP) and diethyl 2-bromo-2-methylmalonate (DBMM) were purchased from Alfa Aesar Chemicals and used as received. Ethyl-bromopropanoate (EBrP) and ethyl-2-bromoisobutanoate (EBiB) and Diethyl Bromomalonate (DBM) were purchased from Energy Chemical and used as received. All the initiators were stored in a brown bottle inside a freezer below 5°C.

Unless otherwise specified, all other chemicals and solvents were purchased from Energy chemical, J&K, Adamas or TCI chemicals, and were used as received without further purification.

### ***Characterization of synthesized organic photocatalysts (OPCs)***

Newly synthesized OPCs were characterized by  $^1\text{H}$  NMR,  $^{13}\text{C}$  NMR, and high-resolution mass spectroscopy.  $^1\text{H}$  NMR,  $^{13}\text{C}$  NMR spectra were recorded using Bruker AVIII 400 spectrometer or AVANCE NEO 600 spectrometer. Chemical shift values were recorded as parts per million (ppm) relative to tetramethylsilane (TMS), chloroform or dichloromethane as internal standard, and coupling constants ( $J$ ) in Hertz. The following abbreviations were used to explain the multiplicities: s = singlet, d = doublet, t = triplet, q = quartet, m = multiplet, br = broad. Mass spectra were recorded on an Agilent Q-TOF 6520 system using electrospray ionization in Positive/Negative ion detection (ESI<sup>+</sup>/ESI<sup>-</sup>) mode. Significant fragments are reported in the following fashion:  $m/z$  (relative intensity).

### ***Characterization of synthesized polymers***

Newly synthesized polymers were characterized by  $^1\text{H}$  NMR and gel permeation chromatography (GPC). The number-average molecular weight ( $M_{n, GPC}$ ) and molecular weight distribution ( $M_w/M_n$ ) values of the obtained polymers determined by a Waters 1515 gel permeation chromatograph (GPC) equipped with a Waters 2414 refractive-index detector, using a Styragel HR 3 THF ( $7.8 \times 300$  mm) Column and a Styragel HR 4 THF ( $7.8 \times 300$  mm) column with measurable molecular weights ranging from  $10^2$  to  $10^6$  g·mol<sup>-1</sup>. THF was used as eluent at a flow rate of 1.0 mL/min at 35 °C. GPC samples were injected manually and PSS poly(methyl methacrylate) standards were used for calibration. Analysis of some polymer samples' absolute molecular weights was performed via gel permeation chromatography (GPC) coupled with multi-angle light scattering (MALS), using an Agilent HPLC fitted with one guard column and two Shodex GPC KD-806M gel permeation columns, a Wyatt Technology TrEX differential refractometer, and a Wyatt Technology DAWN EOS light scattering detector, using THF as the eluent at a flow rate of 1.0 mL/min. The  $dn/dc$  value used for PMMA was 0.084 and the  $dn/dc$  value used for PBA was 0.065.

Conversions for homopolymerization and copolymerization are recorded by nuclear magnetic resonance proton spectroscopy or gravimetric methods. The polymer composition was determined using a  $^1\text{H}$  NMR spectrometer (Bruker AVIII 400 MHz spectrometer or AVANCE NEO 600 MHz spectrometer) with  $\text{CDCl}_3$  or  $d$ -DMSO as the solvent.

Matrix assisted laser desorption/ionization time-of-flight mass (MALDI-TOF-MS) spectra were recorded in linear positive ion mode and externally calibrated with "TOF/TOF calibration" standard solution. The acceleration voltage was set to 19.53 KV and the extraction delay time used was 350 ns. Thin layer method was used by spotting 0.5  $\mu\text{L}$  of PMMA sample (dissolved in THF), 0.5  $\mu\text{L}$  of matrix [*trans*-2-3-(4-*tert*-Butylphenyl) 2-methyl-2-propenylidene] malononitrile (DCTB)] on the target plate (ground steel) and allowed to dry at ambient conditions before spectral acquisition.

### ***Photophysical measurements***

The ultraviolet–visible (UV–vis) spectra were obtained using a Perkins Elmer Lambda 900 spectrometer equipped with a PTP-1 Peltier temperature controller and the photoluminescence (PL) spectra were recorded at room temperature on an Edinburgh Instruments, FLS980 spectrometer equipped with a 450 W Xe lamp for excitation and detected by a photomultiplier (PMT R928P). UV–vis measurements were carried out using anhydrous DCM solution at sample concentration of 0.04, 0.08, 0.12 mM respectively. (Transparent cuvette on four sides:  $1 \times 1 \times 5 \text{ cm}^3$ ); PL measurements were carried out using anhydrous DCM solution at sample concentration of 0.08 mM. Fluorescence decay measurements were carried out by the time-correlated single photon counting (TCSPC) technique. TCSPC event timer with 1 ns time resolution was used to measure the PL decay. The excitation source was a 340nm pulsed light emitting diode (EP-LED Edinburgh Instruments) of pulse width (FWHM) 835.5 ps. The decay time fitting procedure was carried out by using the F980 software (Edinburgh Instruments). Smallest residual values were obtained in the fitting procedure.

### ***Electrochemical measurements***

Cyclic voltammetry experiments were carried out with a CHI660 D electrochemical workstation (Shanghai Chenhua Instrument Plant, China) using a one compartment electrolysis cell consisting of a typical glassy carbon working electrode (3 mm diameter), a platinum wire counter electrode, and a Ag/AgCl reference electrode. Before performing electrochemical cleaning, the electrode should be sonicated in ethanol and deionized water for 1~3mins respectively to obtain a clean electrode. There is no graininess on the electrode surface when polishing on a Microcloth polishing fleece coated with  $1\mu\text{M}$  and  $0.05\mu\text{M}$  alumina powder (both purchased from Shanghai Chenhua) and the polishing can be stopped. For Step1, scan CV until no obvious oxidation peak existence. Subsequently, CV was swept in a 1 mM  $\text{K}_3[\text{Fe}(\text{CN})_6]/0.1\text{M}$  KCl solution (sweep rate: 50 mV/s, potential window: -0.1-0.5 V, number of turns: 4). Calculate the potential difference peak potential difference of the last circle of CV, the potential difference is required to be close to 59 mV (optimum: 64 mV, acceptable: 65~72 mV). Specifically, the electrode is a silver wire that is coated with a thin layer of silver chloride and an insulated lead wire connects the silver wire with measuring instrument. The electrode also consists of a porous plug on the one end which will allow contact between the field environment with the silver chloride electrolyte. Saturated potassium chloride is added inside the body of the electrode to stabilize the silver chloride concentration and in this condition the electrode's reference potential is known to be +0.197 V at 25 °C. The measurements were done in 1.0 mM DCM solution with 0.1 M tetrabutylammonium hexafluorophosphate ( $n\text{-Bu}_4\text{NPF}_6$ , TCI chemicals) as supporting electrolyte at a scan rate of 50 mV/s. The redox potential was calibrated after each experiment against the ferrocenium/ferrocenecouple ( $\text{Fc}^+/\text{Fc}$ ), which allowed conversion of all potentials to the aqueous saturated calomel electrode (SCE) scale by using  $E^0(\text{Fc}^+/\text{Fc}) = 0.42 \text{ V vs. SCE in CH}_3\text{CN}$ .

### ***DFT calculation***

We carried out density functional theory, DFT, calculations using the Gaussian09 program package. Geometries optimization calculations were carried out by a meta-GGA hybrid functional PBE0 with 6-31G\* basis set for all atoms. Vibrational frequencies were calculated analytically at the same level to obtain the thermodynamic corrections. For details, see: **Computational Details**.

## 2. The setup of photocatalytic ATRP polymerization

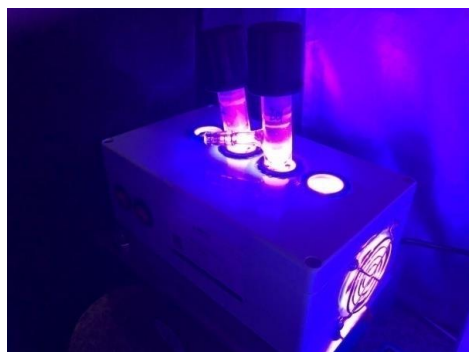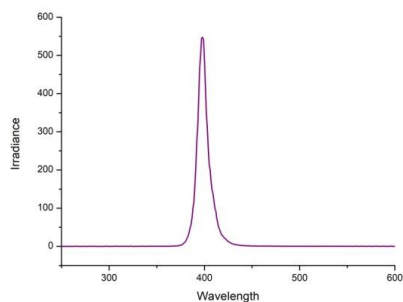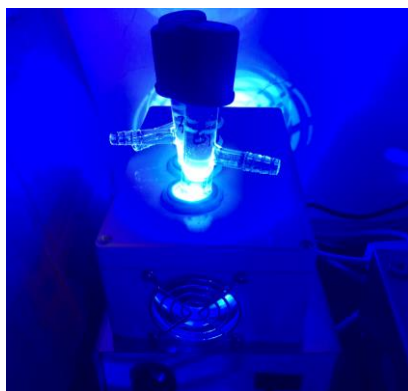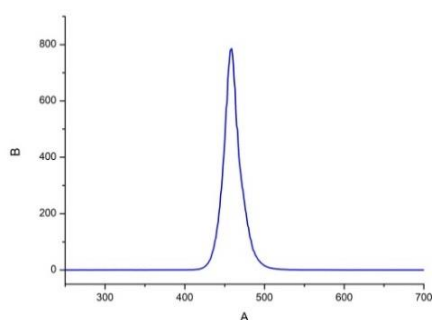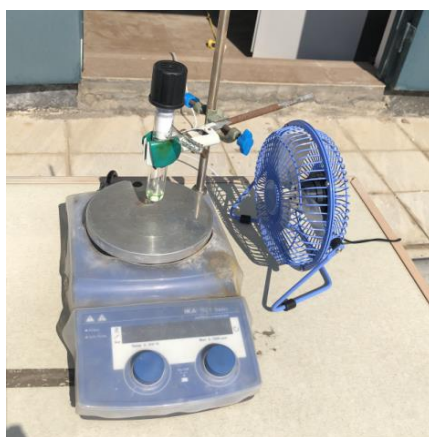

**Supplementary Figure 1 | Reactors with 6 W Purple LEDs ( $\lambda_{\text{max}} = 400 \text{ nm}$ ), 6 W blue LEDs ( $\lambda_{\text{max}} = 460 \text{ nm}$ ) and under sunlight irradiation**

6 W purple LEDs and 6 W blue LEDs reactors were purchased from GeAo Chemical (see: [www.geaochem.com/](http://www.geaochem.com/)) and were used as shown above (Figure S1). All reactions were conducted in a 6 W purple LEDs reactor placed 1 cm from light. At this distance, we estimate the light intensity of 6 W purple LEDs and 6 W blue LEDs to be  $\sim 25 \text{ mW/cm}^2$  and  $\sim 30 \text{ mW/cm}^2$  respectively.

### 3. Synthesis and characterization of photocatalysts

#### *Synthesis of organic photocatalyst 5a-5d<sup>2</sup>*

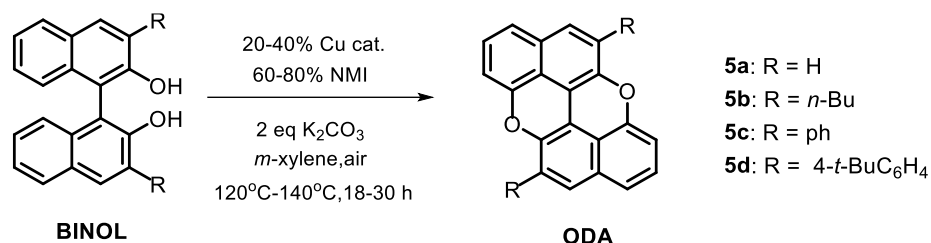

Under ambient air, 1,1'-bi-2-naphthol (143 mg, 0.5 mmol), K<sub>2</sub>CO<sub>3</sub> (138 mg, 1 mmol), CuCl(I) (15.0 mg, 0.15 mmol). *m*-xylene was added (3 mL), followed by N-methylimidazole (24  $\mu$ L, 0.30 mmol). The vessel was heated at 120 °C for 30 h. After removal of solvent under reduced pressure, the residue was filtered through silica gel short pad with CHCl<sub>3</sub> as the eluent and recrystallized from toluene to afford oxygen-dopant of anthracene product ODA **5a** in 75% yield (106 mg) as yellow solid.

#### xantheno[2,1,9,8-*klmna*]xanthene

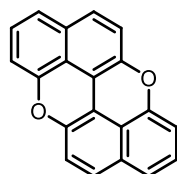

*NMR and HRMS data for the catalyst 5a:*

**<sup>1</sup>H NMR (400 MHz, CD<sub>2</sub>Cl<sub>2</sub>):**  $\delta$  (ppm): 7.31 (d, *J* = 8.8 Hz, 2H), 7.09 (m, 4H), 6.90 (d, *J* = 8.8 Hz, 2H), 6.63 (m, 2H).

**<sup>13</sup>C NMR (100 MHz, CD<sub>2</sub>Cl<sub>2</sub>):**  $\delta$  (ppm): 153.0, 144.6, 131.7, 127.6, 126.8, 121.9, 120.5, 117.7, 111.8, 109.0.

**HRMS (ESI):** *m/z* calculated for C<sub>20</sub>H<sub>10</sub>O<sub>2</sub>: 282.0675, found 282.0674.

#### 5,11-dibutylxantheno[2,1,9,8-*klmna*]xanthene



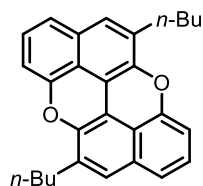

*NMR and HRMS data for the catalyst 5b:*

**<sup>1</sup>H NMR (400 MHz, CDCl<sub>3</sub>):** δ (ppm): 7.09 – 6.98 (m, 6H), 6.58 (d, *J* = 6.8 Hz, 2H), 2.68 (t, *J* = 6.6 Hz, 4H), 1.68 – 1.64 (m, 4H), 1.45 – 1.40 (m, 4H), 0.98 (t, *J* = 6.4 Hz, 6H).

**<sup>13</sup>C NMR (100 MHz, CDCl<sub>3</sub>):** δ (ppm): 152.8, 143.5, 132.1, 131.4, 127.0, 125.3, 120.5, 119.4, 111.5, 107.7, 32.0, 29.6, 22.6, 14.1.

**HRMS (ESI):** *m/z* calculated for C<sub>28</sub>H<sub>26</sub>O<sub>2</sub>: 349.1927, found 349.1926.

**5,11-diphenylxantheno[2,1,9,8-klmna]xanthene**

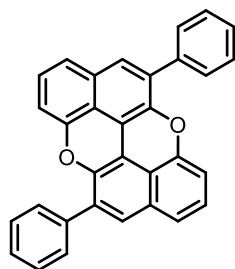

*NMR and HRMS data for the catalyst 5c:*

**<sup>1</sup>H NMR (600 MHz, CDCl<sub>3</sub>):** δ (ppm): 7.66 (d, *J* = 7.2 Hz, 4H), 7.49 (t, *J* = 7.5 Hz, 4H), 7.42 (m, 2H), 7.37 (s, 2H), 7.08-7.12 (m, 4H), 6.60 (d, *J* = 7.2 Hz, 2H).

**<sup>13</sup>C NMR (150 MHz, CD<sub>2</sub>Cl<sub>2</sub>):** δ (ppm): 152.5, 142.2, 136.7, 131.4, 131.3, 129.6, 128.4, 127.9, 127.6, 127.2, 121.1, 120.2, 112.4, 108.8.

**HRMS (ESI):** *m/z* calculated for C<sub>32</sub>H<sub>18</sub>O<sub>2</sub>: 434.1307, found 434.1313.

**5,11-bis(4-(tert-butyl)phenyl)xantheno[2,1,9,8-klmna]xanthene**

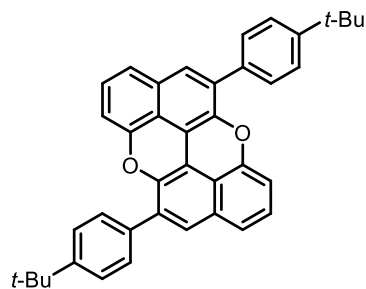

*NMR and HRMS data for the catalyst 5d:*

**<sup>1</sup>H NMR (600 MHz, CDCl<sub>3</sub>):** δ (ppm): 7.62 (d, *J* = 7.8 Hz, 4H), 7.51 (d, *J* = 8.4 Hz, 4H), 7.37 (s, 2H), 7.07 - 7.11 (m, 4H), 6.62 (dd, *J* = 6.8, 1.5 Hz, 2H), 1.41 (s, 18H).

**<sup>13</sup>C NMR (150 MHz, CD<sub>2</sub>Cl<sub>2</sub>):** δ (ppm): 152.5, 150.9, 142.3, 133.7, 131.4, 131.1, 129.2, 127.5, 127.0, 125.4, 121.0, 120.1, 112.4, 108.7, 34.8, 31.5.

**HRMS (ESI):** *m/z* calculated for C<sub>40</sub>H<sub>34</sub>O<sub>2</sub>: 546.2559, found 546.2565.

### UV-Vis absorption spectra

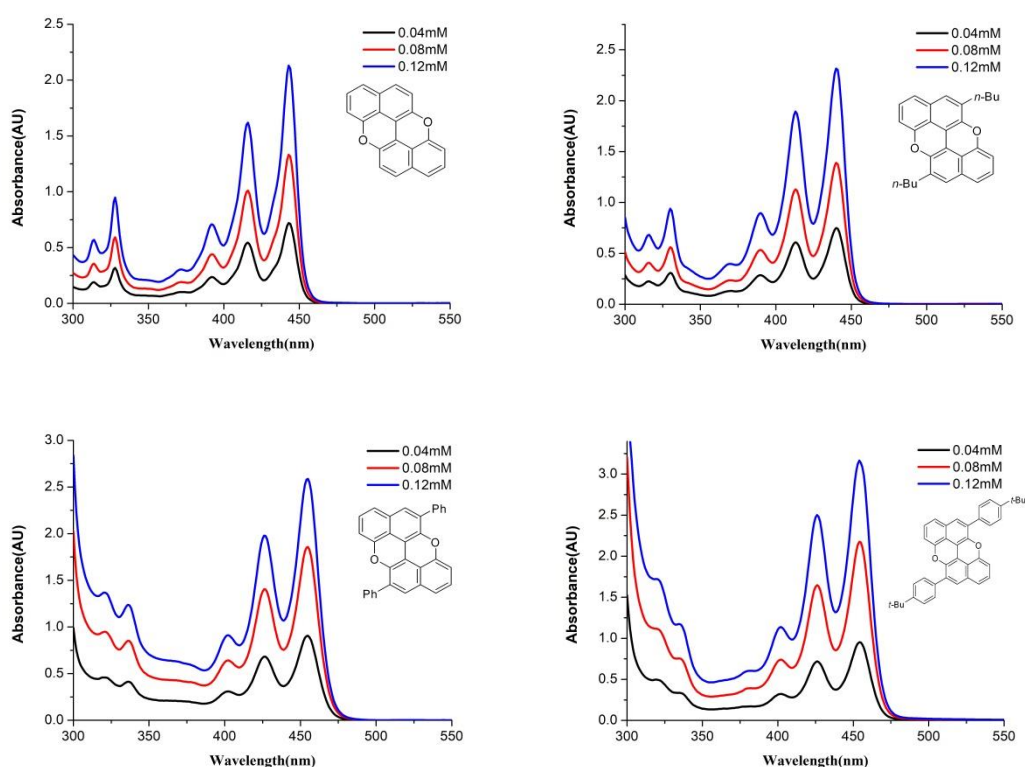

**Supplementary Figure 2 | UV-Vis spectra of catalysts 5a, 5b, 5c and 5d at different concentration in DCM.**

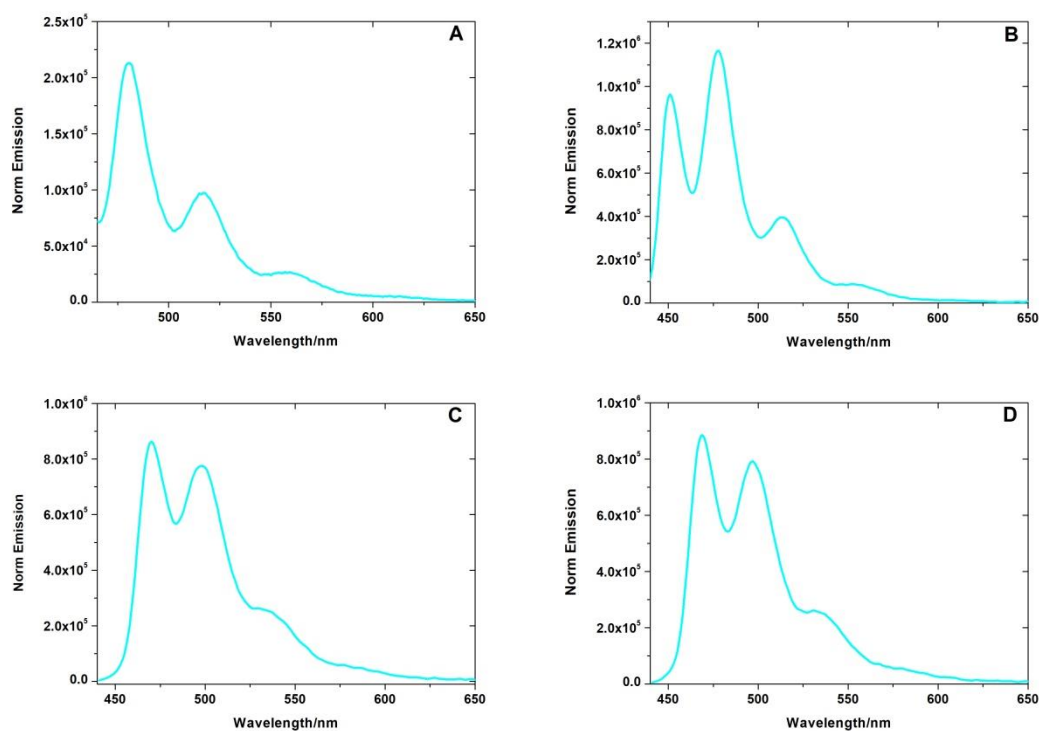

**Supplementary Figure 3 | Fluorescence emission spectra of catalyst 5a (A), 5b (B), 5c (C) and 5d (D) in DCM.**

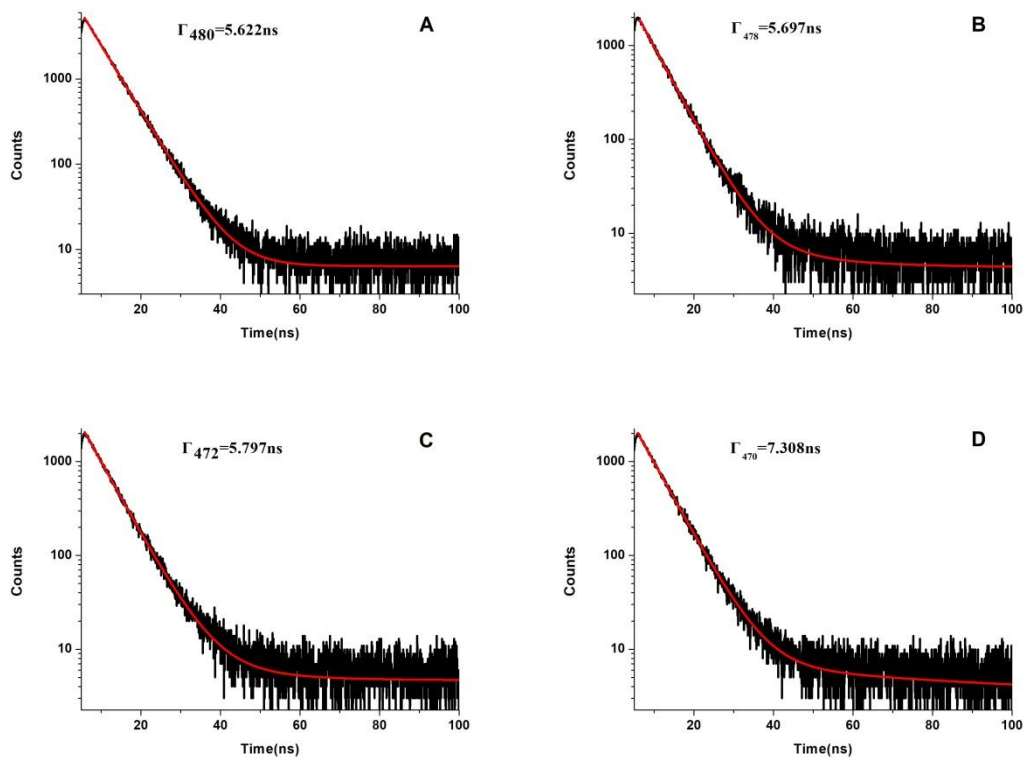

**Supplementary Figure 4 | Time-resolved emission decay curves of catalyst 5a (A), 5b (B), 5c (C) and 5d (D) in DCM.**

### *Cyclic voltammetry*

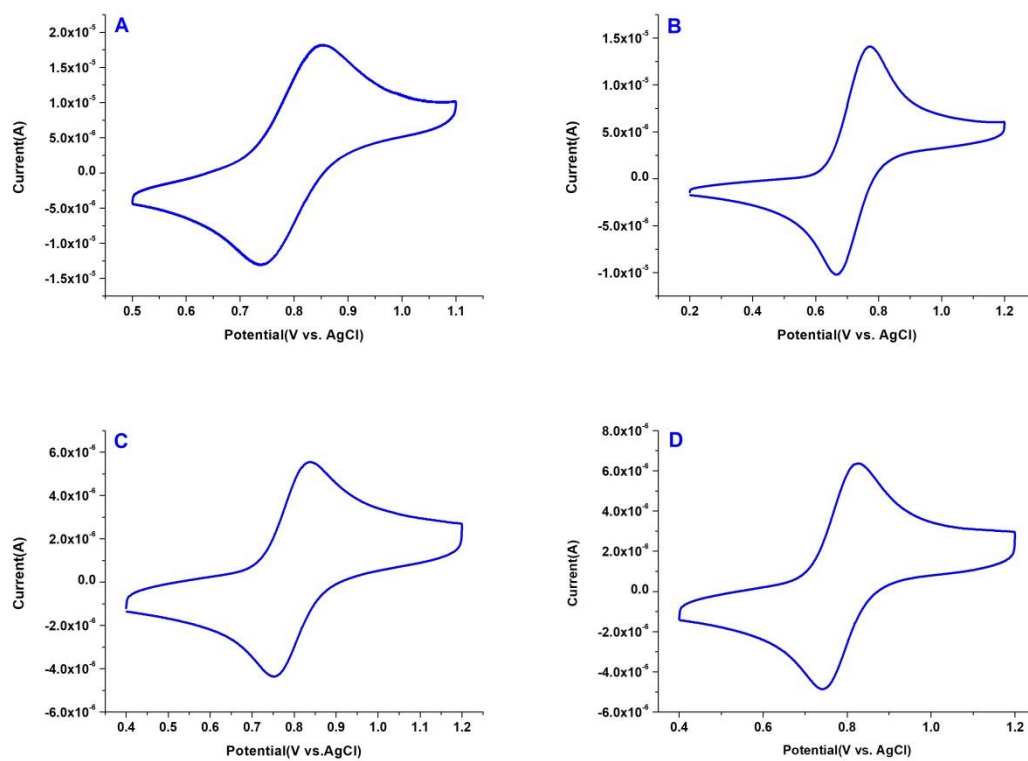

**Supplementary Figure 5 | Cyclic voltammograms (vs. Ag/AgCl) of catalyst 5a (A), 5b (B), 5c (C) and 5d (D) in DCM.**

### *Experimental determination of excited state reduction potentials*

Using photoluminescence maximum and  $E^{\text{ox}}$ , the excited state reduction potential was estimated for OPCs ( $E_{\text{red}}(\text{OPC}^{\bullet+}/\text{OPC}^*)$ ) according to the following equations<sup>3</sup>

$$E_{\text{red}}(\text{OPC}^{\bullet+}/\text{OPC}^*) = E^{\text{ox}} - E_{0,0}$$

$$\text{where } E_{0,0} = hc / \lambda_{\text{max}} = 1240 \text{ nm} / \lambda_{\text{max}}$$

**Supplementary Table 1. Experimentally measured excited state reduction potentials of 5a-d**

| Photocatalyst | Abs<br>$\lambda_{\text{max}}(\text{nm})$ | $\epsilon$ $\lambda_{\text{max}}$<br>( $\text{M}^{-1} \text{cm}^{-1}$ ) | em<br>$\lambda_{\text{max}}(\text{nm})$ | $E^{\text{ox}}$<br>vs. SCE | $E_{\text{red}}(\text{PC}^{\bullet+}/\text{PC}^*)$<br>vs. SCE |
|---------------|------------------------------------------|-------------------------------------------------------------------------|-----------------------------------------|----------------------------|---------------------------------------------------------------|
| <b>5a</b>     | <b>443</b>                               | <b>17450</b>                                                            | <b>481</b>                              | <b>+0.82 V</b>             | <b>-1.76V</b>                                                 |
| <b>5b</b>     | <b>442</b>                               | <b>18460</b>                                                            | <b>480</b>                              | <b>+0.74 V</b>             | <b>-1.84V</b>                                                 |
| <b>5c</b>     | <b>454</b>                               | <b>22580</b>                                                            | <b>470</b>                              | <b>+0.81 V</b>             | <b>-1.82V</b>                                                 |
| <b>5d</b>     | <b>455</b>                               | <b>23950</b>                                                            | <b>469</b>                              | <b>+0.80 V</b>             | <b>-1.84V</b>                                                 |

## 4. Polymerization procedures

### *General method for PMMA synthesis*

A typical metal-free organocatalyzed ATRP procedures with the molar ratio of [MMA]<sub>0</sub>: [initiator]<sub>0</sub>: [catalyst]<sub>0</sub> = 100: 1: 0.05 were showed as follows. The polymerization was conducted with MMA (1.0 mL, 9.35 mmol, 100 eq.) as the model monomer, DBMM (18 µL, 93.5 µmol, 1.0 eq.) as the ATRP initiator, organic photocatalyst (4.70 µmol, 0.5 eq.) and DCM (1.0 mL) as the solvent in a Schlenk tube with a PTFE stirring bar. The mixture was deoxygenized by freeze–pump–thaw cycle three times, backfilled argon and sealed up subsequently. And then the polymerization was occurred under purple LED or blue LED irradiation at room temperature. After the desired time, the tube was opened under argon and 20.0 µL of mixture were syringed out and quenched into CDCl<sub>3</sub> containing 250 ppm BHT to determine the monomer conversion by <sup>1</sup>H NMR. The reaction mixture was then diluted with 0.5 mL dichloromethane and dissolved completely, then dripped into 75 mL methanol and stirred for 2 hours. The precipitates was then collected by suction filtration with a Buchner funnel and dried in vacuum oven until a constant weight at 30 °C to give the purified polymers.

For extremely low ppm PC loading experiments, the addition of reagents was conducted in glovebox, other parts as usual. Stock solution of PCs and initiators in dichloromethane were used for a better reproducibility. (Take **5d** as an example: stock solution of **5d**: 1.88 µmol/mL in DCM, weigh 5.10 mg **5d** (9.4 µmol) accurately, dissolve in 5 mL anhydrous dichloromethane, and dilute again if necessary. Second dilution (In chain extension and block polymer experiments of 50/10 ppm PC loading), take 0.5 mL of **5d** solution and dissolve in 4.5 mL of anhydrous dichloromethane to obtain 0.188 µmol/mL pre-prepared solution). All syntheses and manipulations of air- and moisture-sensitive materials were carried out in flamed Schlenk-type glassware on a dual-manifold Schlenk line, on a high-vacuum line, or in an argon-filled glovebox.

### *General method for other polymers synthesis*

A typical ATRP procedure for standard reaction conditions [monomer]<sub>0</sub>: [DBMM]<sub>0</sub>: [**5d**]<sub>0</sub> = [100]: [1]: [0.001] was carried out as follows. A Schlenk tube with a PTFE stirring bar was charged with monomer (6.88 mmol, 100 eq.), DBMM (13.2 µL, 68.8 µmol, 1.0 eq.), PC (0.0688 µmol, 0.001 eq.) and anhydrous DCM as solvent (the 1.2 times volume of solvent as that of the monomer added), inside the glove box.

Subsequently, the polymerization was carried out for a certain period of time under blue LED irradiation at room temperature. The tube was opened under argon and 20.0  $\mu\text{L}$  of mixture were syringed out and quenched into  $\text{CDCl}_3$  containing 250 ppm BHT to determine the monomer conversion by  $^1\text{H}$  NMR. To isolate the polymers, reaction mixture was first diluted with 1.0 mL of dichloromethane and dissolved completely, then poured into beaker containing methanol (150 mL) which caused the polymer to precipitate. Subsequent stirring for 2 h, followed by vacuum filtration resulted in dried polymers.

#### ***Polymerization procedure for light on-off experiment***

Light on-off experiments were performed in glovebox using a [MMA]:[DBMM] ratio of 200:1 with 500 ppm of **5d** and 1 mL:1.5 mL of MMA: DCM. The samples were irradiated for one hour time at which point an aliquot was taken for  $^1\text{H}$  NMR. The lights were turned off and the reaction vial was wrapped entirely in aluminum foil. After same time of dark period, another aliquot was taken for NMR. The lights were turned back on and the sample was irradiated for two hours, at which point an aliquot was taken for characterization. The lights were turned off and the samples were subjected to another two hour dark period. This light on-off cycle was repeated several times until over 80% conversion of the monomer was achieved.

#### ***General methods for analysis of kinetics and molecular weight growth***

A typical procedure of kinetics experiments were performed in glovebox using a [MMA]:[DBMM] ratio of 200:1 with 500 ppm **5d** and 1 mL:1.5 mL MMA: DCM. To evaluate the kinetics and growth of molecular weight versus conversion for polymerization, an aliquot of 0.1-0.15 mL of reaction mixture was taken and injected into a solution of  $\text{CDCl}_3$  containing 250 ppm of the radical inhibitor (BHT), at predetermined times after the start of the polymerization as indicated (when the reaction mixture was exposed to light). Specifically, the operation that each aliquot is taken in this manner to ensure no further introduction of air throughout the polymerization. The aliquot was analysed by  $^1\text{H}$  NMR spectroscopy to determine the conversion at that time. After NMR analysis, the sample was dried under air, re-dissolved in DCM and drop into  $\text{CH}_3\text{OH}$  for precipitation, and the  $M_n$  and  $M_w/M_n$  were analysed by GPC. Analysis of kinetics and molecular weight growth of other catalysts loading can be found in the supplementary details below.

### ***Procedure for PMMA macroinitiator synthesis***

MMA (2.00 mL, 18.8 mmol, 100 eq.), DBMM (72  $\mu$ L, 376  $\mu$ mol, 2 eq.), and **5d** (5.0 mg, 9.4  $\mu$ mol, 0.05 eq.) were dissolved in 2.50 mL DCM and reacted according to the above general polymerization procedure for 8 hours. After that, the tube was opened under argon and 20.0  $\mu$ L of mixture were syringed out and quenched into CDCl<sub>3</sub> containing 250 ppm BHT to determine the monomer conversion by <sup>1</sup>H NMR (Conv. = 70.4%). At this time, the reaction was removed, poured into 250 mL methanol and stirred for 4 h. The resulting precipitate was then isolated by vacuum filtration and washed with excess methanol. The polymer was then re-dissolved in a minimal amount of DCM again and dripped into 150 mL of methanol and stirred for 2 h to fully remove unreacted monomer, initiator or catalyst. The product was again collected by vacuum filtration and dried under reduced pressure to reveal a slight yellow powder. ( $M_n$  = 4.1 kDa,  $M_w$  = 4.8 kDa,  $D$  = 1.18) (GPC trace in **Figure 4.**, black line)

### ***Chain extension and block copolymerization from PMMA macroinitiator***

#### **Synthesis of PMMA-*b*-PMMA**

A Schlenk tube with a PTFE stirring bar was charged with 0.66 mg of **5d** ( $1.2 \times 10^{-6}$  mol, 0.05 eq.) and 99 mg of the PMMA macroinitiator described above ( $M_n$  = 4.1 kDa, 1.0 eq.) which were dissolved in 1.0 mL of DCM. Then 0.63 mL of MMA were added ( $5.87 \times 10^{-3}$  mol, 243 eq.), reacted according to the above general polymerization procedure for 12 hours. The resulting polymer was isolated according to the above general polymerization procedure and analyzed. After 12 hours, the reaction mixture was loaded into a syringe and slowly dripped into room temperature methanol to precipitate the polymer. After stirring for 4 h, the polymer was collected via vacuum filtration, washed multiple times with excess methanol and dried in vacuum oven until a constant weight at 30 °C to yield 0.578 g of polymer (81% conversion by gravimetric analysis). The resulting chain extended PMMA was found to have  $M_n$  = 32.5 kDa,  $D$  = 1.45. (GPC trace in **Figure 4.**, green line).

#### **Synthesis of PMMA-*b*-PBnMA**

A Schlenk tube with a PTFE stirring bar was charged with 0.29 mg of **5d** ( $0.52 \times 10^{-6}$  mol, 0.05 eq.) and 43 mg of the PMMA macroinitiator described above ( $M_n$  = 4.1 kDa, 1.0 eq.) which were dissolved in 1.50 mL of DCM. Then 0.90 mL of BnMA were added



( $5.31 \times 10^{-3}$  mol, 510 eq.), reacted according to the above general polymerization procedure for 14 hours. The resulting polymer was isolated according to the above general polymerization procedure and analyzed. After 14 hours, the reaction mixture as loaded into a syringe and slowly dripped into room temperature methanol to precipitate the polymer. After stirring for 4 h, the polymer was collected via vacuum filtration, washed multiple times with excess methanol and dried in vacuum oven until a constant weight at 30 °C to yield 0.778 g of polymer (78% yield). The resulting PMMA-*b*-BnMA copolymer was found to have  $M_n = 98.2$  kDa,  $D = 1.58$ . (GPC trace in **Figure 4.**, red line).

### Synthesis of PMMA-*b*-PBA

A Schlenk tube with a PTFE stirring bar was charged with 0.25 mg of **5d** ( $0.427 \times 10^{-6}$  mol, 0.05 eq.) and 28 mg of the PMMA macroinitiator described above ( $M_n = 4.1$  kDa, 1.0 eq.) which were dissolved in 1.50 mL of DCM. Then 1.05 mL of BA were added (7.29 mmol, 1070 eq.), reacted according to the above general polymerization procedure for 9 hours. The resulting polymer was isolated according to the above general polymerization procedure and analyzed. After 9 hours, the reaction mixture as loaded into a syringe and slowly dripped into room temperature methanol to precipitate the polymer. After stirring for 2 h, a yellow oil crashed out, and the solution was placed into a freezer (ca. -20 °C) for 1 h. The methanol was then decanted off and the residual solvent was removed under reduced pressure. This process was repeated once to yield 0.770 g of a yellow oil (80% yield). The resulting PMMA-*b*-BA copolymer was found to have  $M_n = 228$  kDa,  $D = 1.63$  (GPC trace in **Figure 4.**, blue line).

## 5. Supplementary Data

**Supplementary Table 2. Polymerization results of O-ATRP of MMA in various solvents.<sup>a</sup>**

| Entry | PC        | Solvent | Conv  | $M_n$ (kDa) | $M_w$ (kDa) | $\bar{D}$ |
|-------|-----------|---------|-------|-------------|-------------|-----------|
| 1     | <b>5a</b> | DMA     | 88.5% | 19.9        | 26.6        | 1.34      |
| 2     | <b>5a</b> | DCM     | 73.3% | 12.8        | 16.0        | 1.25      |
| 3     | <b>5a</b> | DMF     | 83.4% | 18.3        | 24.3        | 1.33      |
| 4     | <b>5a</b> | Toluene | 88.1% | 17.4        | 23.0        | 1.32      |
| 5     | <b>5a</b> | Dioxane | 87.3% | 19.5        | 25.9        | 1.33      |
| 6     | <b>5a</b> | THF     | 91.2% | 21.4        | 29.3        | 1.37      |

<sup>a</sup>Polymerizations of methyl methacrylate were performed at [100]:[1]:[0.05] using EBP as the initiator with purple LED irradiation for 10h and the same volume of solvent as that of the monomer added. ( $M_n$  = number-average molecular weight;  $M_w$  = weight-average molecular weight). Conv. measured by <sup>1</sup>H NMR,  $M_n$  and  $\bar{D}$  were determined using GPC with PMMA standards.

**Supplementary Table 3. Polymerization of MMA with different photocatalysts and initiators.<sup>a</sup>**

| 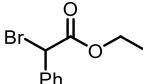 |  |  |  |  |             |           |
|-------------------------------------------------------------------------------------|-------------------------------------------------------------------------------------|-------------------------------------------------------------------------------------|-------------------------------------------------------------------------------------|---------------------------------------------------------------------------------------|-------------|-----------|
| <b>EBP</b>                                                                          | <b>EBrP</b>                                                                         | <b>EBiB</b>                                                                         | <b>DBM</b>                                                                          | <b>DBMM</b>                                                                           |             |           |
| Entry                                                                               | Initiator                                                                           | PC                                                                                  | Conv                                                                                | $M_n$ (kDa)                                                                           | $M_w$ (kDa) | $\bar{D}$ |
| 1                                                                                   | EBP                                                                                 | <b>5a</b>                                                                           | 73.3%                                                                               | 12.8                                                                                  | 15.8        | 1.24      |
| 2                                                                                   |                                                                                     | <b>5b</b>                                                                           | 66.5%                                                                               | 12.3                                                                                  | 14.6        | 1.19      |
| 3                                                                                   |                                                                                     | <b>5c</b>                                                                           | 79.2%                                                                               | 13.8                                                                                  | 16.8        | 1.22      |
| 4                                                                                   |                                                                                     | <b>5d</b>                                                                           | 88.2%                                                                               | 13.5                                                                                  | 16.6        | 1.23      |
| 5                                                                                   | EBrP                                                                                | <b>5a</b>                                                                           | 72.7%                                                                               | 13.3                                                                                  | 16.8        | 1.27      |
| 6                                                                                   |                                                                                     | <b>5b</b>                                                                           | 59.2%                                                                               | 11.3                                                                                  | 12.9        | 1.15      |
| 7                                                                                   |                                                                                     | <b>5d</b>                                                                           | 76.9%                                                                               | 13.9                                                                                  | 17.1        | 1.23      |
| 8 <sup>c</sup>                                                                      | EBiB                                                                                | <b>5a</b>                                                                           | 78.2%                                                                               | 14.9                                                                                  | 18.3        | 1.23      |
| 9                                                                                   |                                                                                     | <b>5b</b>                                                                           | 71.5%                                                                               | 13.9                                                                                  | 15.9        | 1.17      |
| 10                                                                                  |                                                                                     | <b>5d</b>                                                                           | 86.2%                                                                               | 12.8                                                                                  | 14.8        | 1.16      |
| 11                                                                                  | DBM                                                                                 | <b>5a</b>                                                                           | 80.8%                                                                               | 13.7                                                                                  | 16.7        | 1.22      |
| 12                                                                                  |                                                                                     | <b>5b</b>                                                                           | 60.7%                                                                               | 13.4                                                                                  | 15.7        | 1.17      |

|    |      |           |       |      |      |      |
|----|------|-----------|-------|------|------|------|
| 13 |      | <b>5d</b> | 78.2% | 12.5 | 11.3 | 1.16 |
| 14 | DBMM | <b>5a</b> | 81.2% | 12.8 | 15.2 | 1.19 |
| 15 |      | <b>5b</b> | 69.1% | 13.5 | 12.3 | 1.15 |
| 16 |      | <b>5d</b> | 84.8% | 12.0 | 13.4 | 1.12 |

<sup>a</sup> Reaction conditions: MMA (100 equiv), photocatalyst (0.05 equiv), initiator(1.0 equiv), anhydrous DCM (9.4 M of MMA) at room temperature with irradiation from purple LEDs for 10 h. Conv. measured by <sup>1</sup>H NMR,  $M_n$  and  $\bar{D}$  were determined using GPC with PMMA standards.

**Supplementary Table 4. Results for polymerization of MMA with various component ratios.<sup>a</sup>**

| Entry | Ratio       | PC        | Conv  | $M_{n,exp}$ | $M_{n,theo.}$ | $\bar{D}$ |
|-------|-------------|-----------|-------|-------------|---------------|-----------|
| 1     | 500:10:0.5  | <b>5a</b> | 71.2% | 6.20        | 3.82          | 1.14      |
| 2     | 1000:20:0.5 | <b>5a</b> | 79.5% | 7.55        | 4.23          | 1.17      |
| 3     | 750:10:0.5  | <b>5a</b> | 75.6% | 8.90        | 5.92          | 1.19      |
| 4     | 1000:10:0.5 | <b>5a</b> | 81.2% | 12.9        | 8.38          | 1.19      |
| 5     | 1000:5:0.5  | <b>5a</b> | 66.7% | 17.6        | 13.6          | 1.30      |
| 6     | 2500:10:1   | <b>5a</b> | 65.2% | 22.1        | 16.5          | 1.34      |
| 7     | 1000:2:1    | <b>5a</b> | 50.4% | 28.6        | 25.4          | 1.47      |
| 8     | 500:10:0.5  | <b>5b</b> | 65.9% | 6.10        | 3.55          | 1.14      |
| 9     | 1000:20:0.5 | <b>5b</b> | 68.3% | 5.40        | 3.67          | 1.16      |
| 10    | 750:10:0.5  | <b>5b</b> | 54.2% | 7.40        | 4.32          | 1.17      |
| 11    | 1000:10:0.5 | <b>5b</b> | 69.1% | 13.5        | 7.17          | 1.15      |
| 12    | 1000:5:0.5  | <b>5b</b> | 67.7% | 18.4        | 13.8          | 1.38      |
| 13    | 2500:10:1   | <b>5b</b> | 70.5% | 22.8        | 17.8          | 1.37      |
| 14    | 1000:2:1    | <b>5b</b> | 44.2% | 29.5        | 22.4          | 1.51      |
| 15    | 500:10:0.5  | <b>5d</b> | 66.4% | 5.70        | 3.57          | 1.15      |
| 16    | 1000:20:0.5 | <b>5d</b> | 62.5% | 7.00        | 3.38          | 1.13      |
| 17    | 750:10:0.5  | <b>5d</b> | 76.6% | 8.20        | 6.00          | 1.13      |
| 18    | 1000:10:0.5 | <b>5d</b> | 84.8% | 12.0        | 8.74          | 1.12      |

|                 |             |           |       |      |      |      |
|-----------------|-------------|-----------|-------|------|------|------|
| 19              | 1000:5:0.5  | <b>5d</b> | 73.9% | 17.4 | 15.0 | 1.25 |
| 20              | 2000:10:0.5 | <b>5d</b> | 64.9% | 16.6 | 13.2 | 1.27 |
| 21              | 2500:10:1   | <b>5d</b> | 70.8% | 22.6 | 17.9 | 1.32 |
| 22              | 1000:2:1    | <b>5d</b> | 58.5% | 34.9 | 29.5 | 1.54 |
| 23 <sup>b</sup> | 1000:0:0.5  | <b>5d</b> | 4.9%  | /    | 40.4 | 1.53 |
| 24 <sup>b</sup> | 1000:0:0.01 | <b>5d</b> | 3.5%  | /    | 33.2 | 1.46 |
| 25 <sup>b</sup> | 1000:10:0   | <b>5d</b> | <2%   | /    | /    | /    |

<sup>a</sup> Reaction conditions: Photoinduced metal-free ATRP of methyl methacrylate using DBMM as the initiator. Ratio = [MMA]:[DBMM]:[PC]. Solvent: DCM (9.4 M of MMA) at room temperature with irradiation from purple LEDs for 10 h. Conv. measured by <sup>1</sup>H NMR,  $M_n$  and  $\bar{D}$  were determined using GPC with PMMA standards. <sup>b</sup> With 6W blue LEDs, 8 h.

**Supplementary Table 5. Polymerization with different ratios at 10 ppm catalyst loading.<sup>a</sup>**

| Entry | [MMA]:[I]:[PC] | Initiator | PC        | Light Source | Time | Conv  | $M_{n, GPC}$ | $\bar{D}$ |
|-------|----------------|-----------|-----------|--------------|------|-------|--------------|-----------|
| 1     | 100:1:0.001    | EBP       | <b>5d</b> | Purple LEDs  | 11 h | 84.6% | 15.4         | 1.28      |
| 2     | 100:1:0.001    | EBP       | <b>5d</b> | Blue LEDs    | 11 h | 90.2% | 14.9         | 1.27      |
| 3     | 1000:5:0.01    | DBMM      | <b>5d</b> | Blue LEDs    | 12 h | 76.7% | 20.0         | 1.26      |
| 4     | 1000:15:0.01   | DBMM      | <b>5d</b> | Blue LEDs    | 12 h | 90.5% | 11.0         | 1.15      |
| 5     | 1000:20:0.01   | DBMM      | <b>5d</b> | Blue LEDs    | 12 h | 93.9% | 10.3         | 1.14      |

<sup>a</sup> The polymerizations were performed under standard conditions. Conversions were measured by <sup>1</sup>H NMR.  $M_n$  and  $\bar{D}$  were determined using GPC with PMMA standards.

**Supplementary Table 6. Polymerization of other monomers.<sup>a</sup>**

| <div style="display: flex; justify-content: space-around; align-items: center;"> <div style="text-align: center;"> 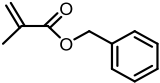<br/>BnMA         </div> <div style="text-align: center;"> <br/>TFEMA         </div> <div style="text-align: center;"> <br/>BA         </div> <div style="text-align: center;"> <br/>St         </div> </div> |         |           |            |      |      |       |             |             |           |
|---------------------------------------------------------------------------------------------------------------------------------------------------------------------------------------------------------------------------------------------------------------------------------------------------------------------------------------------------------------------------------------------------------------------------------------------------------------------------------------------------------------------------------------------------------------------------------------------------------------------------------------------------------------------------------|---------|-----------|------------|------|------|-------|-------------|-------------|-----------|
| Entry                                                                                                                                                                                                                                                                                                                                                                                                                                                                                                                                                                                                                                                                           | Monomer | PC        | PC loading | Sol. | Time | Conv  | $M_n$ (kDa) | $M_w$ (kDa) | $\bar{D}$ |
| 1                                                                                                                                                                                                                                                                                                                                                                                                                                                                                                                                                                                                                                                                               | BnMA    | <b>5d</b> | 10 ppm     | DCM  | 12h  | 86.4% | 11.0        | 16.8        | 1.53      |
| 2                                                                                                                                                                                                                                                                                                                                                                                                                                                                                                                                                                                                                                                                               |         | <b>5d</b> | 10 ppm     | DMA  | 12h  | 97.3% | 14.2        | 22.7        | 1.61      |
| 3                                                                                                                                                                                                                                                                                                                                                                                                                                                                                                                                                                                                                                                                               | BnMA    | <b>5d</b> | 50 ppm     | DCM  | 12h  | 93.5% | 11.5        | 14.8        | 1.29      |
| 4                                                                                                                                                                                                                                                                                                                                                                                                                                                                                                                                                                                                                                                                               |         | <b>5d</b> | 50 ppm     | DMA  | 12h  | 95.1% | 14.0        | 18.0        | 1.29      |
| 5                                                                                                                                                                                                                                                                                                                                                                                                                                                                                                                                                                                                                                                                               | TFEMA   | <b>5d</b> | 10 ppm     | DCM  | 12h  | 87.5% | 13.6        | 16.6        | 1.22      |
| 6                                                                                                                                                                                                                                                                                                                                                                                                                                                                                                                                                                                                                                                                               |         | <b>5d</b> | 10 ppm     | DMA  | 12h  | 88.1% | 17.1        | 19.8        | 1.16      |

|    |         |           |          |     |     |       |      |      |            |
|----|---------|-----------|----------|-----|-----|-------|------|------|------------|
| 7  | TFEMA   | <b>5d</b> | 50 ppm   | DCM | 12h | 81.6% | 11.5 | 12.5 | 1.09       |
| 8  |         | <b>5d</b> | 50 ppm   | DMA | 12h | 86.3% | 16.2 | 17.9 | 1.11       |
| 9  | BA      | <b>5d</b> | 10 ppm   | DCM | 7h  | 78.2% | 22.3 | 33.2 | 1.49(1.37) |
| 10 |         | <b>5d</b> | 10 ppm   | DMA | 7h  | 88.2% | 56.8 | 92.6 | 1.63       |
| 11 | BA      | <b>5d</b> | 50 ppm   | DCM | 7h  | 91.6% | 30.8 | 43.4 | 1.41(1.29) |
| 12 |         | <b>5d</b> | 50 ppm   | DMA | 7h  | 94.8% | 40.2 | 55.1 | 1.37       |
| 13 |         | <b>5d</b> | 500 ppm  | DCM | 7h  | 83.5% | 19.2 | 26.1 | 1.36(1.19) |
| 14 |         | <b>5d</b> | 1000 ppm | DCM | 7h  | 99%   | 28.8 | 37.1 | 1.29(1.11) |
| 15 | Styrene | <b>5d</b> | 10 ppm   | DCM | 36h | 38.7% | 9.40 | 33.6 | 3.58       |
| 16 |         | <b>5d</b> | 10 ppm   | DMA | 36h | 42.6% | 8.30 | 17.7 | 2.13       |
| 17 | Styrene | <b>5d</b> | 50 ppm   | DCM | 36h | 33.9% | 13.8 | 29.7 | 2.15       |
| 18 |         | <b>5d</b> | 50 ppm   | DMA | 36h | 36.8% | 6.47 | 12.9 | 1.99       |

<sup>a</sup> The polymerization of other monomers are initiated by DBMM using **5d** under blue LEDs irradiation. [Monomer]:[DBMM]=100:1. Conv. measured by <sup>1</sup>H NMR, *M<sub>n</sub>* and *Đ* were determined using GPC with PMMA standards. *Đ* in parenthesis were measured with GPC coupled with MALS.

**Supplementary Table 7. RAFT polymerization of MMA at extremely low catalyst loadings.<sup>a</sup>**

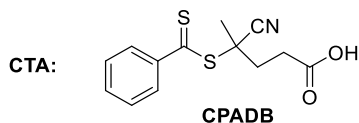

| Entry | PC                         | loading | CTA   | Intensity<br>mw/cm <sup>2</sup> /time | Conv. | <i>M<sub>n</sub></i> (kDa) | <i>Đ</i>   |
|-------|----------------------------|---------|-------|---------------------------------------|-------|----------------------------|------------|
| 1     | <b>5d</b>                  | 5ppm    | CPADB | 30 (10 h)                             | 75%   | 35.4                       | 1.19       |
| 2     | <b>Ir(ppy)<sub>3</sub></b> | 1ppm    | CPADB | 30 (9 h)                              | 79%   | 32.5                       | 1.26       |
| 3     | <b>Ir(ppy)<sub>3</sub></b> | 1ppm    | CPADB | 3 (21 h)                              | 84%   | 18.2                       | 1.08       |
| 4     | <b>5d</b>                  | 1ppm    | CPADB | 3 (18 h)                              | 49%   | 11.2(11.6)                 | 1.07(1.03) |
| 5     | /                          | /       | CPADB | 3 (18 h)                              | 0%    | /                          | /          |
| 6     | <b>5d</b>                  | 5ppm    | CPADB | 3 (18 h)                              | 80%   | 16.4                       | 1.06       |
| 7     | <b>5a</b>                  | 5ppm    | CPADB | 3 (18 h)                              | 62%   | 13.2(13.4)                 | 1.07(1.03) |
| 8     | <b>5a</b>                  | 5ppm    | CPADB | Sunlight(18h)                         | 41%   | 12.1                       | 1.08       |
| 9     | <b>5a</b>                  | 10ppm   | CPADB | Sunlight(18h)                         | 60%   | 15.4                       | 1.08       |
| 10    | <b>5d</b>                  | 1ppm    | CPADB | Sunlight(18h)                         | 34%   | 10.8                       | 1.08       |
| 11    | <b>5d</b>                  | 5ppm    | CPADB | Sunlight(18h)                         | 40%   | 11.5                       | 1.07       |
| 12    | <b>5d</b>                  | 10ppm   | CPADB | Sunlight(18h)                         | 51%   | 13.8                       | 1.07       |

13<sup>b</sup>      **5d**      10ppm      CPADB      Sunlight(18h)      67%      14.0      1.07

<sup>a</sup> Reaction conditions: [MMA]:[CTA]:[PC]= 200:1:x ppm in DMSO with irradiation by blue LEDs or bulb or sunlight. Conv. measured by <sup>1</sup>H NMR,  $M_n$  and  $\bar{D}$  were determined using GPC with PMMA standards.  $M_n$  and  $\bar{D}$  in parenthesis were measured with GPC coupled with MALS. <sup>b</sup> The experiment was repeated on a different sunny day.

**Supplementary Table 8. A comparison (initiator efficiency) of polymerization of MMA using undistilled (used as received from Alfa Aesar Chemicals) or distilled DBMM.<sup>a</sup>**

| Entry | PC loading     | DBMM        | Conv. | $M_{n,theo}(\text{kDa})$ | $M_{n,GPC}(\text{kDa})$ | $\bar{D}$ | I% <sup>[b]</sup> |
|-------|----------------|-------------|-------|--------------------------|-------------------------|-----------|-------------------|
| 1     | (100:1) 500ppm | undistilled | 71.8% | 7.45                     | 10.9                    | 1.15      | 68.3              |
| 2     | (100:1) 500ppm | distilled   | 86.2% | 8.89                     | 10.5                    | 1.18      | 84.6              |
| 3     | (100:1) 10ppm  | undistilled | 90.4% | 9.31                     | 14.5                    | 1.17      | 64.4              |
| 4     | (100:1) 10ppm  | distilled   | 96.9% | 9.96                     | 12.2                    | 1.19      | 82.5              |
| 5     | (200:1) 500ppm | undistilled | 64.9% | 13.2                     | 16.6                    | 1.27      | 79.6              |
| 6     | (200:1) 500ppm | distilled   | 83.8% | 17.0                     | 20.3                    | 1.27      | 83.7              |
| 7     | (200:1) 10ppm  | undistilled | 76.7% | 15.6                     | 20.0                    | 1.26      | 78.3              |
| 8     | (200:1) 10ppm  | distilled   | 93.2% | 18.9                     | 20.2                    | 1.29      | 93.5              |

<sup>a</sup> Reaction conditions: [MMA]:[DBMM]:[**5d**]= 100:1:x or 200:1:x in DCM at room temperature with irradiation by 460nm blue LEDs in Ar. Solvent: DCM (9.4 M of MMA). Conv. measured by <sup>1</sup>H NMR,  $M_n$  and  $\bar{D}$  were determined using GPC with PMMA standards. <sup>[b]</sup> I % =  $(M_{n,theo})/(M_{n,GPC}) \times 100\%$ ,  $M_{n,theo} = [\text{monomer}]/[\text{initiator}] \times M_w \text{ of monomer} \times \text{Conv. \%} + M_w \text{ of initiator}$ .

## 6. NMR spectra of precipitated polymer products

### *End-Group Analysis of PMMA Synthesized Using O-ATRP*

MMA (2.00 mL, 18.8 mmol, 100 eq.), EBP (65.6  $\mu$ L, 376  $\mu$ mol, 2 eq.), and **5d** (9.4  $\mu$ mol, 0.05 eq.) were dissolved in 2.0 mL DCM and reacted according to the above general polymerization procedure for 8 hours. At this time, the reaction was removed, poured into 150 mL methanol and stirred for 4 h. The resulting precipitate was isolated by vacuum filtration and washed with excess methanol. The polymer was then re-dissolved in a minimal amount of DCM again dripped into 150 mL methanol and stirred for 2 h. The product was again collected by vacuum filtration and dried under reduced pressure to reveal a slight yellow powder. ( $M_n = 6.90$  kDa,  $\bar{D} = 1.15$ ).

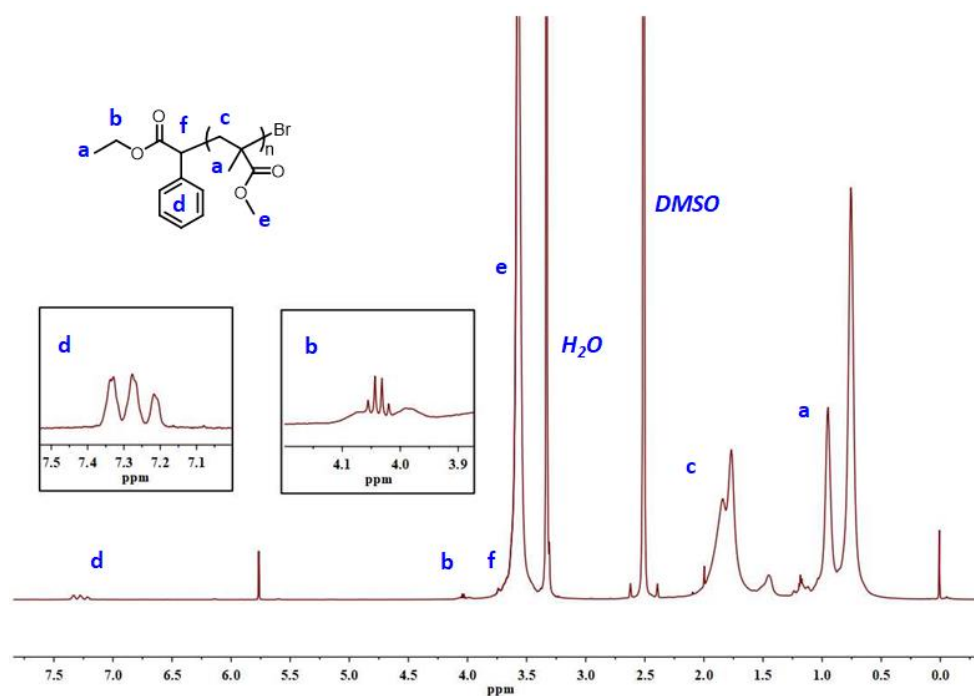

**Supplementary Figure 6 |  $^1\text{H}$  NMR spectrum of isolated poly(methyl methacrylate) ( $\text{DMSO-}d_6$ )**

*Other polymers synthesized Using O-ATRP*

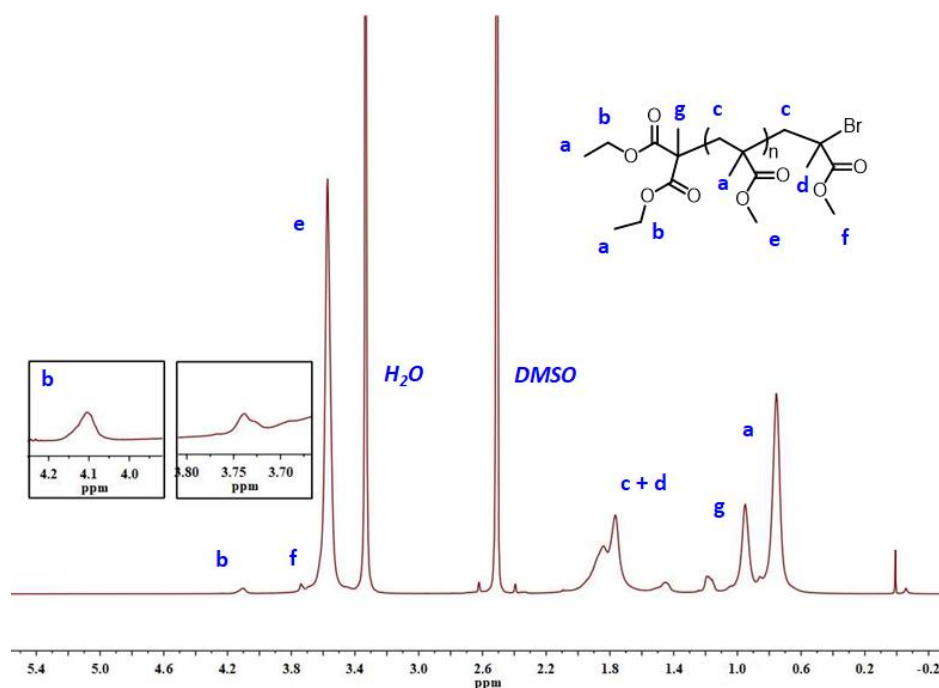

**Supplementary Figure 7** |  $^1\text{H}$  NMR spectrum of isolated poly(methyl methacrylate) made using **5d** (10ppm PC loading) as the catalyst. (DMSO-*d*<sub>6</sub>)

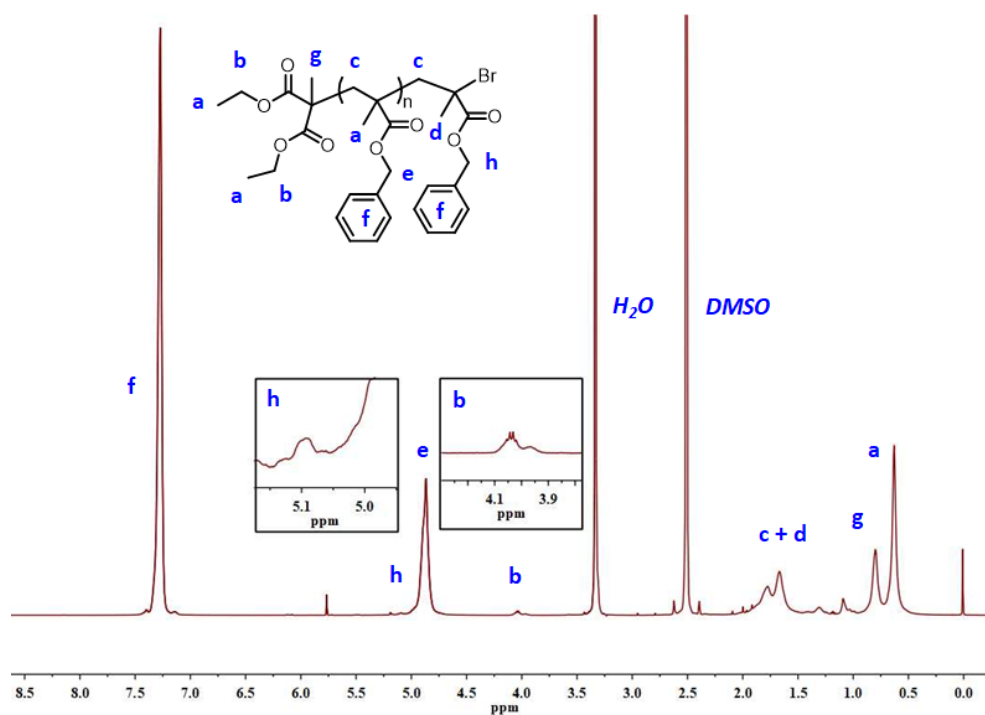

**Supplementary Figure 8** |  $^1\text{H}$  NMR spectrum of isolated poly(benzyl methacrylate) made using **5d** (10ppm PC loading) as the catalyst. (DMSO-*d*<sub>6</sub>)



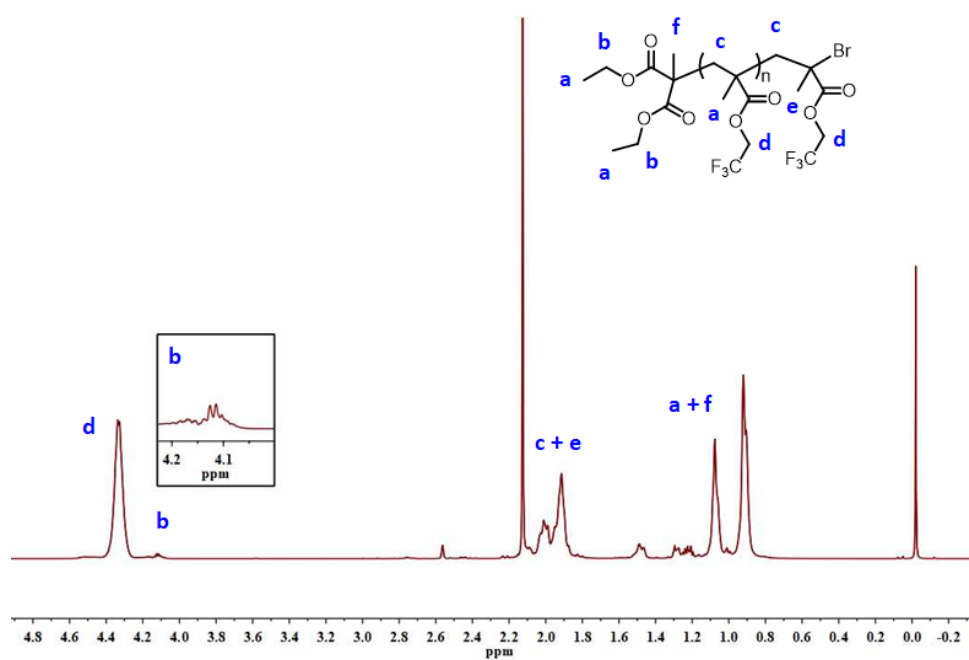

**Supplementary Figure 9** |  $^1\text{H}$  NMR spectrum of isolated poly(2,2,2-trifluoroethyl methacrylate) made using **5d** (10ppm PC loading) as the catalyst. ( $\text{CDCl}_3$ )

## 7. MALDI-TOF analysis of polymer

MMA (1.00 mL, 9.35 mmol, 1000 eq.), DBMM (18.0  $\mu$ L, 93.5  $\mu$ mol, 10 eq.), and **5d** (2.5 mg, 9.35  $\mu$ mol, 0.5 eq.) were dissolved in 1.20 mL DCM and reacted according to the above general polymerization procedure for 10 hours. At this time, the reaction was removed, dripped into 150 mL methanol and stirred for 2 h. The resulting precipitate was then isolated by vacuum filtration and washed with excess methanol. The polymer was then re-dissolved in a minimal amount of DCM again and dripped into 100 mL of methanol and stirred for 1 h to fully remove unreacted monomer, initiator or catalyst. The product was again collected by vacuum filtration and dried under reduced pressure to reveal a slight yellow powder ( $M_n = 5.20$  kDa,  $\bar{D} = 1.14$ ).

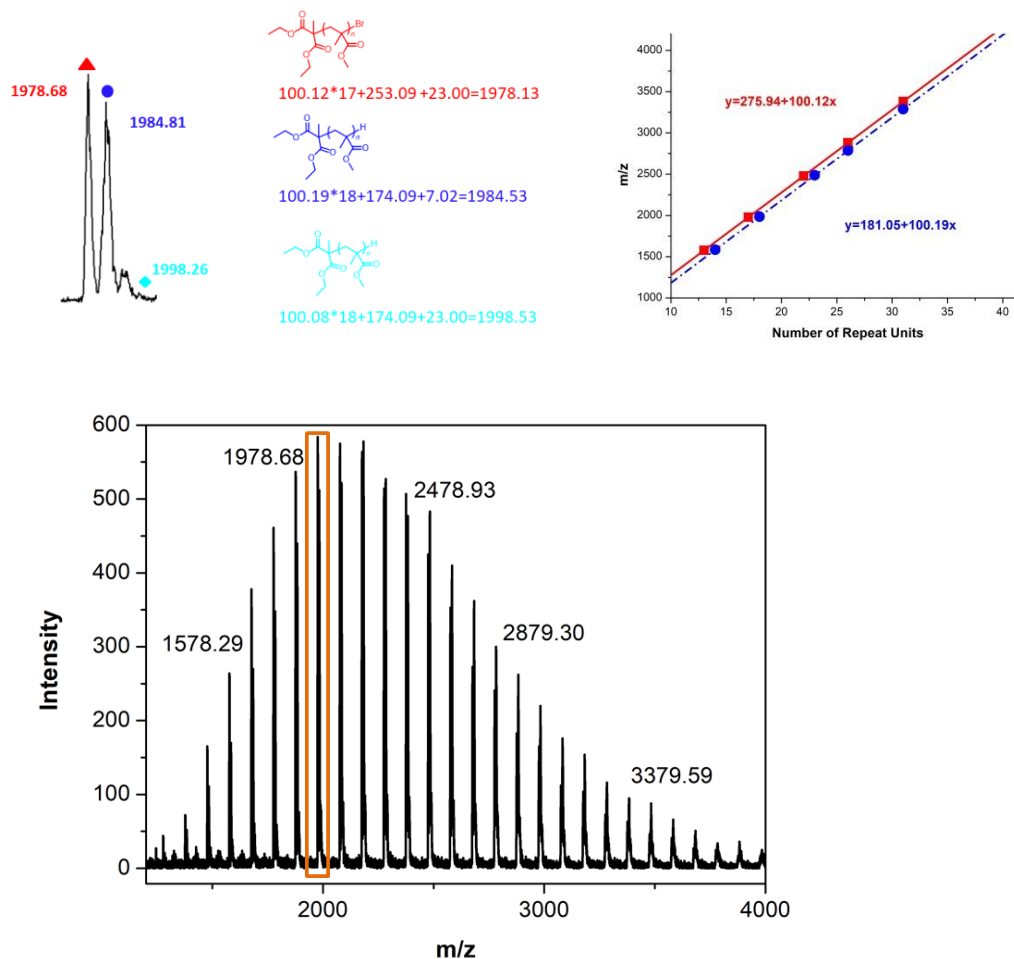

**Supplementary Figure 10** | MALDI-TOF mass spectrum of a poly(methyl methacrylate) sample.

## 8. Additional chain extension and block copolymerization data

### *Procedure for PMMA macroinitiator synthesis (50 ppm)*

Inside a glovebox, MMA (2.00 mL, 18.8 mmol, 100 eq.), DBMM (72  $\mu$ L, 376  $\mu$ mol, 2 eq.), and **5d** (0.5 mg, 0.50 mL, 0.94  $\mu$ mol, 0.005 eq.) (stock solution of **5d**: 1.88  $\mu$ mol/mL in anhydrous DCM, 5.1 mg of **5d** (9.4  $\mu$ mol) in 5.00 mL of anhydrous dichloromethane, diluted again if necessary) were dissolved in 2.00 mL DCM and reacted according to the above general polymerization procedure for 10 hours. The tube was opened under argon and 20.0  $\mu$ L of mixture were syringed out and quenched into CDCl<sub>3</sub> containing 250 ppm BHT to determine the monomer conversion by <sup>1</sup>H NMR (Conv. = 88.3%). After that, the reaction was removed, poured into 250 mL methanol and stirred for 4h. The resulting precipitate was then isolated by vacuum filtration and washed with excess methanol. The polymer was then re-dissolved in a minimal amount of dichloromethane again and dripped into 150ml of methanol and stirred for 2h to fully remove unreacted monomer, initiator or catalyst. The product was again collected by vacuum filtration and dried under reduced pressure to reveal a white powder. ( $M_n$  = 6.30 kDa,  $M_w$  = 7.40 kDa,  $D$  = 1.19) (GPC trace in **Figure S11**, black line)

### *Chain extension and block copolymerization from PMMA macroinitiator (50 ppm)*

#### Synthesis of PMMA-*b*-PMMA

Inside a glovebox, a Schlenk tube with a PTFE stirring bar was charged with 0.048 mg of **5d** ( $8.9 \times 10^{-8}$  mol, 0.005 eq.) (stock solution of **5d**: 0.188  $\mu$ mol/mL in anhydrous DCM was used for accurate addition) and 112 mg of the PMMA macroinitiator described above ( $M_n$  = 6.30 kDa, 1.0 eq.) which were dissolved in 0.80 mL of DCM. Then 0.40 mL of MMA were added ( $3.76 \times 10^{-3}$  mol, 212 eq.), reacted according to the above general polymerization procedure for 10 hours. The resulting polymer was isolated according to the above general polymerization procedure and analyzed. After 10 hours, the reaction mixture was loaded into a syringe and slowly dripped into room temperature methanol to precipitate the polymer. After stirring for 4 h, the polymer was collected via vacuum filtration, washed multiple times with excess methanol and dried in vacuum oven until a constant weight at 30 °C to yield 0.357 g of polymer (65 % conversion by gravimetric analysis). The resulting chain extended PMMA was found to have  $M_n$  = 20.7 kDa,  $D$  = 1.37. (GPC trace in **Figure S11**, red line).

#### Synthesis of PMMA-*b*-PBnMA

Inside a glovebox, a Schlenk tube with a PTFE stirring bar was charged with 0.055 mg of **5d** ( $1.0 \times 10^{-7}$  mol, 0.005 eq.) (stock solution of **5d**: 0.188  $\mu\text{mol/mL}$  in anhydrous DCM was used for accurate addition) and 126 mg of the PMMA macroinitiator described above ( $M_n = 6.30$  kDa, 1.0 eq.) which were dissolved in 1.30 mL of DCM. Then 0.65 mL of BnMA were added ( $3.8 \times 10^{-3}$  mol, 191 eq.), reacted according to the above general polymerization procedure for 10 hours. The resulting polymer was isolated according to the above general polymerization procedure and analyzed. After 10 hours, the reaction mixture was loaded into a syringe and slowly dripped into room temperature methanol to precipitate the polymer. After stirring for 4 h, the polymer was collected via vacuum filtration, washed multiple times with excess methanol and dried in vacuum oven until a constant weight at 30 °C to yield 0.477 g of polymer (52% yield). The resulting PMMA-*b*-BnMA copolymer was found to have  $M_n = 31.8$  kDa,  $D = 1.54$ . (GPC trace in **Figure S11**, green line).

### Synthesis of PMMA-*b*-PBA

Inside a glovebox, a Schlenk tube with a PTFE stirring bar was charged with 0.020 mg of **5d** ( $0.37 \times 10^{-7}$  mol, 0.005 eq.) (stock solution of **5d**: 0.188  $\mu\text{mol/mL}$  in anhydrous DCM was used for accurate addition) and 47 mg of the PMMA macroinitiator described above ( $M_n = 6.30$  kDa, 1.0 eq.) which were dissolved in 1.2 mL of DCM. Then 0.58 mL of BA were added ( $4.01 \times 10^{-3}$  mol, 540 eq.), reacted according to the above general polymerization procedure for 7 hours. The resulting polymer was isolated according to the above general polymerization procedure and analyzed. After 7 hours, the reaction mixture was loaded into a syringe and slowly dripped into room temperature methanol to precipitate the polymer. After stirring for 2 h, a yellow oil crashed out, and the solution was placed into a freezer (ca. -20 °C) for 1 h. The methanol was then decanted off and the residual solvent was removed under reduced pressure. This process was repeated once to yield 0.301 g of a yellow oil (52% yield). The resulting PMMA-*b*-BA copolymer was found to have  $M_n = 112$  kDa,  $D = 1.54$  (GPC trace in **Figure S11**, blue line).

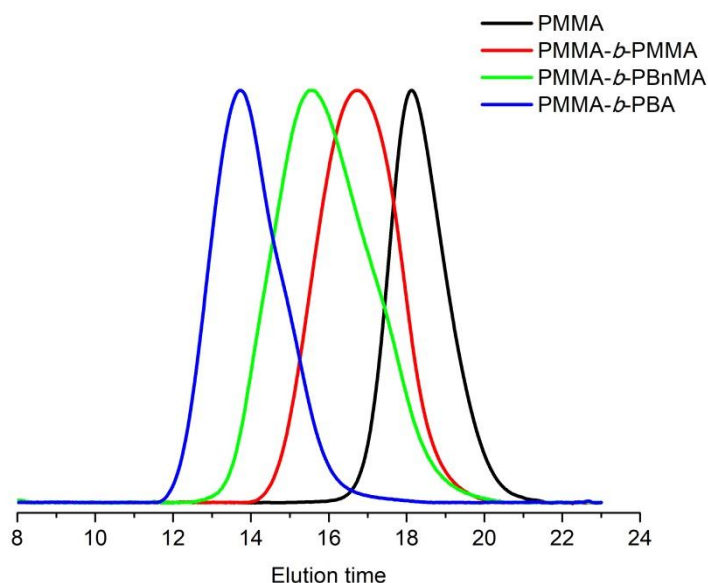

**Supplementary Figure 11 | Block polymer preparation.** Polymerization of methyl methacrylate performed according to the general polymerization procedure using photoredox catalyst **5d** at 50 ppm catalyst loading under blue LED irradiation. Chain-extension from a PMMA macro-initiator (black) to produce block copolymers with = MMA (red), BnMA (green), and BA (blue).

***Procedure for PMMA macroinitiator synthesis (10 ppm)***

Inside a glovebox, MMA (2.00 mL, 18.8 mmol, 100 eq.), DBMM (72  $\mu$ L, 376  $\mu$ mol, 2 eq.), and **5d** (0.1 mg, 0.1mL, 0.188  $\mu$ mol, 0.001eq.) (stock solution of **5d**: 1.88  $\mu$ mol/mL in anhydrous DCM, 5.10 mg of **5d** (9.4  $\mu$ mol) in 5 mL of anhydrous dichloromethane, diluted again if necessary) were dissolved in 2.50 mL DCM and reacted according to the above general polymerization procedure for 10 hours. The tube was opened under argon and 20.0  $\mu$ L of mixture were syringed out and quenched into CDCl<sub>3</sub> containing 250 ppm BHT to determine the monomer conversion by <sup>1</sup>H NMR (Conv. = 82.5%). After that, the reaction was removed, poured into 250 mL methanol and stirred for 4h. The resulting precipitate was then isolated by vacuum filtration and washed with excess methanol. The polymer was then re-dissolved in a minimal amount of dichloromethane again and dripped into 150ml of methanol and stirred for 2h to fully remove unreacted monomer, initiator or catalyst. The product was again collected by vacuum filtration and dried under reduced pressure to reveal a white powder. ( $M_n$  = 8.40 kDa,  $M_w$  = 10.1 kDa,  $D$  = 1.20) (GPC trace in **Figure S12**, black line)

### *Chain extension and block copolymerization from PMMA macroinitiator (10 ppm)*

#### **Synthesis of PMMA-*b*-PMMA**

Inside a glovebox, A Schlenk tube with a PTFE stirring bar was charged with 0.0107 mg of **5d** ( $1.97 \times 10^{-8}$  mol, 0.001 eq.) (OPC, Pre-configured as a dilute solution for easy and accurate addition, stock solution of **5d**: 0.188  $\mu\text{mol/mL}$  in anhydrous DCM) and 165 mg of the PMMA macroinitiator described above ( $M_n = 8.40$  kDa, 1.0 eq.) which were dissolved in 0.90 mL of DCM. Then 0.46 mL of MMA were added ( $4.33 \times 10^{-3}$  mol, 220 eq.), reacted according to the above general polymerization procedure for 10 hours. The resulting polymer was isolated according to the above general polymerization procedure and analyzed. After 10 hours, the reaction mixture as loaded into a syringe and slowly dripped into room temperature methanol to precipitate the polymer. After stirring for 4h, the polymer was collected via vacuum filtration, washed multiple times with excess methanol and dried in vacuum oven until a constant weight at 30 °C to yield 0.410 g of polymer (57 % conversion by gravimetric analysis). The resulting chain extended PMMA was found to have  $M_n = 22.8$  kDa,  $D = 1.46$ . (GPC trace in **Figure S12**, red line).

#### **Synthesis of PMMA-*b*-PBnMA**

Inside a glovebox, A Schlenk tube with a PTFE stirring bar was charged with 0.0092 mg of **5d** ( $1.69 \times 10^{-8}$  mol, 0.001 eq.) (Stock solution of **5d**: 0.188  $\mu\text{mol/mL}$  in anhydrous DCM was used for accurate addition) and 142 mg of the PMMA macroinitiator described above ( $M_n = 8.40$  kDa, 1.0 eq.) which were dissolved in 1.20 mL of DCM. Then 0.58 mL of BnMA were added ( $3.4 \times 10^{-3}$  mol, 202 eq. ), reacted according to the above general polymerization procedure for 10 hours. The resulting polymer was isolated according to the above general polymerization procedure and analyzed. After 10 hours, the reaction mixture as loaded into a syringe and slowly dripped into room temperature methanol to precipitate the polymer. After stirring for 4 h, the polymer was collected via vacuum filtration, washed multiple times with excess methanol and dried in vacuum oven until a constant weight at 30 °C to yield 0.425 g of polymer (47% yield). The resulting PMMA-*b*-BnMA copolymer was found to have  $M_n = 34.2$  kDa,  $D = 1.60$ . (GPC trace in **Figure S12**, green line).

#### **Synthesis of PMMA-*b*-PBA**

Inside a glovebox, A Schlenk tube with a PTFE stirring bar was charged with 0.0037 mg of **5d** ( $0.68 \times 10^{-8}$  mol, 0.001 eq.) (Stock solution of **5d**: 0.188  $\mu\text{mol/mL}$  in anhydrous DCM was used for accurate addition) and 58 mg of the PMMA macroinitiator described above ( $M_n = 8.40$  kDa, 1.0 eq.) which were dissolved in 1.2 mL of DCM. Then 0.58 mL of BA were added ( $4.01 \times 10^{-3}$  mol, 585 eq.), reacted according to the above general polymerization procedure for 7 hours. The resulting polymer was isolated according to the above general polymerization procedure and analyzed. After 7 hours, the reaction mixture as loaded into a syringe and slowly dripped into room temperature methanol to precipitate the polymer. After stirring for 2 h, a yellow oil crashed out, and the solution was placed into a freezer (ca.  $-20$  °C) for 1 h. The methanol was then decanted off and the residual solvent was removed under reduced pressure. This process was repeated once to yield 0.358 g of a yellow oil (59% yield). The resulting PMMA-*b*-BA copolymer was found to have  $M_n = 125$  kDa,  $D = 1.65$  (GPC trace in **Figure S12**, purple line)

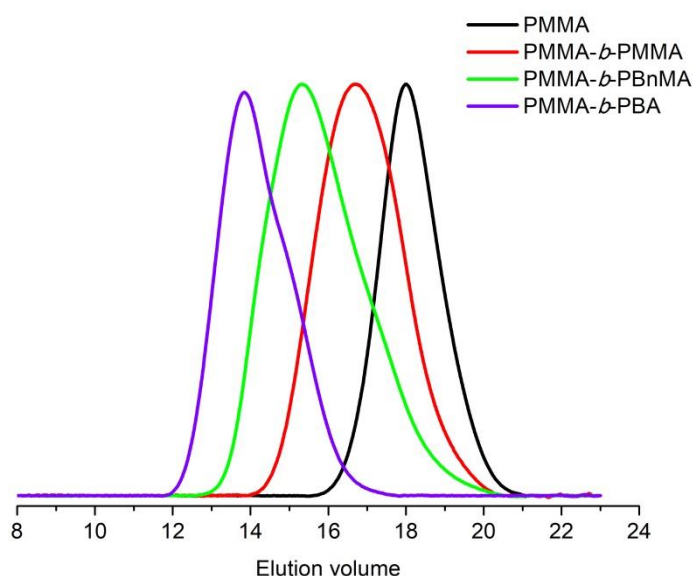

**Supplementary Figure 12 | Block polymer preparation.** Polymerization of methyl methacrylate performed according to the general polymerization procedure using photoredox catalyst **5d** at 10 ppm catalyst loading under blue LED irradiation. Chain-extension from a PMMA macro-initiator (black) to produce block copolymers with MMA (red), BnMA (green), and BA (purple).

## The preparation of triblock copolymer

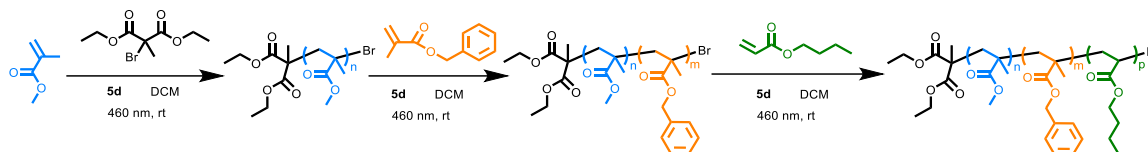

Synthetic route for the synthesis of triblock copolymers (PMMA-*b*-PBnMA-*b*-PBA)

**PMMA macroinitiator Synthesis:** A PMMA macroinitiator was synthesized using 10 ppm ODA **5d** (stock solution of **5d**: 1.88  $\mu\text{mol}/\text{mL}$  in DCM) as PC. Inside a glovebox, MMA (2.00 mL, 18.8 mmol, 100 eq.), DBMM (36  $\mu\text{L}$ , 188  $\mu\text{mol}$ , 1 eq.), and **5d** (0.1 mg, 100  $\mu\text{L}$ , 0.188  $\mu\text{mol}$ , 0.001eq.) were dissolved in 2.50 mL DCM and reacted according to the above general polymerization procedure for 15 hours under the irradiation of blue LED. The tube was opened under argon and 20.0  $\mu\text{L}$  of mixture were syringed out and quenched into  $\text{CDCl}_3$  containing 250 ppm BHT to determine the monomer conversion by  $^1\text{H}$  NMR (Conv. = 96%). After that, the reaction was removed, poured into 250 mL methanol and stirred for 5 h. The resulting precipitate was then isolated by vacuum filtration and washed with excess methanol. The polymer was then re-dissolved in a minimal amount of dichloromethane again and dripped into 150 mL of methanol and stirred for 2 h to fully remove unreacted monomer, initiator or catalyst. The polymer was dried to constant weight under vacuum at 30  $^\circ\text{C}$  to give a white powder. ( $M_n$  = 14.8 kDa,  $M_w$  = 17.8 kDa,  $D$  = 1.20) (GPC trace in **Figure S13**, blue line)

**Synthesis of PMMA-*b*-PBnMA:** Inside a glovebox, A Schlenk tube with a PTFE stirring bar was charged with **5d** ( $0.38 \times 10^{-7}$  mol, 50 ppm, 0.005 eq.) (Stock solution of **5d**: 0.188  $\mu\text{mol}/\text{mL}$  in anhydrous DCM was used for accurate addition) and 115 mg of the PMMA macroinitiator described above ( $M_n$  = 14.8 kDa, 1.0 eq.) which were dissolved in 1.00 mL of DCM. Then 276  $\mu\text{L}$  of BnMA were added ( $1.63 \times 10^{-3}$  mol, 210 eq.), reacted according to the above general polymerization procedure for 7 hours. The resulting polymer was isolated according to the above general polymerization procedure and analyzed. After 7 hours, the reaction mixture as loaded into a syringe and slowly dripped into methanol to precipitate the polymer. After stirring for 4 h, the polymer was collected via vacuum filtration, washed multiple times with excess methanol and dried in vacuum oven until a constant weight at 30  $^\circ\text{C}$  to yield 0.270 g of polymer (54% yield). The resulting PMMA-*b*-BnMA copolymer was found to have  $M_n$  = 39.5 kDa,  $D$  = 1.51. (GPC trace in **Figure S13**, orange line).



**Synthesis of PMMA-*b*-PBnMA-*b*-PBA:** Inside a glovebox, A Schlenk tube with a PTFE stirring bar was charged with **5d** ( $0.28 \times 10^{-7}$  mol, 50 ppm, 0.005 eq.) (Stock solution of **5d**: 0.188  $\mu\text{mol/mL}$  in anhydrous DCM was used for accurate addition) and 225 mg of the PMMA-*b*-PBnMA macroinitiator described above ( $M_n$ = 39.5 kDa, 1.0 eq.) which were dissolved in 0.80 mL of DCM. Then 147  $\mu\text{L}$  of BA were added ( $1.02 \times 10^{-3}$  mol, 180 eq.), reacted according to the above general polymerization procedure for 4 hours. The resulting polymer was isolated according to the above general polymerization procedure and analyzed. After 4 hours, the reaction mixture as loaded into a syringe and slowly dripped into methanol to precipitate the polymer. After stirring for 2 h, a thick polymer crashed out, and the solution was placed into a freezer (ca. -20 °C) for 1 h. The methanol was then decanted off and the residual solvent was removed under reduced pressure. to yield 0.279 g of polymer (42% yield). The resulting PMMA-*b*-BnMA-*b*-PBA copolymer was found to have  $M_n$  = 60.6 kDa,  $D$  = 1.46. (GPC trace in **Figure S13**, green line).

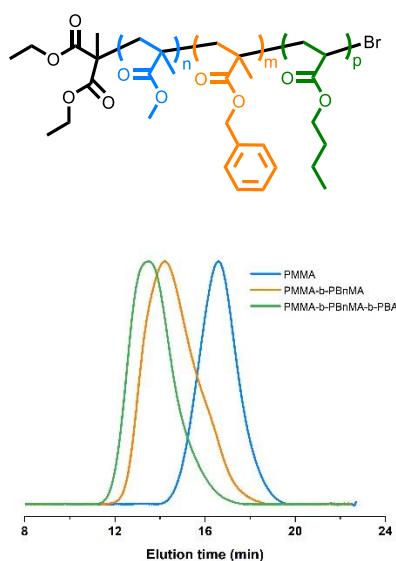

**Supplementary Figure 13 | triblock copolymer PMMA-*b*-PBnMA-*b*-PBA.** Measured using GPC with PMMA standards.

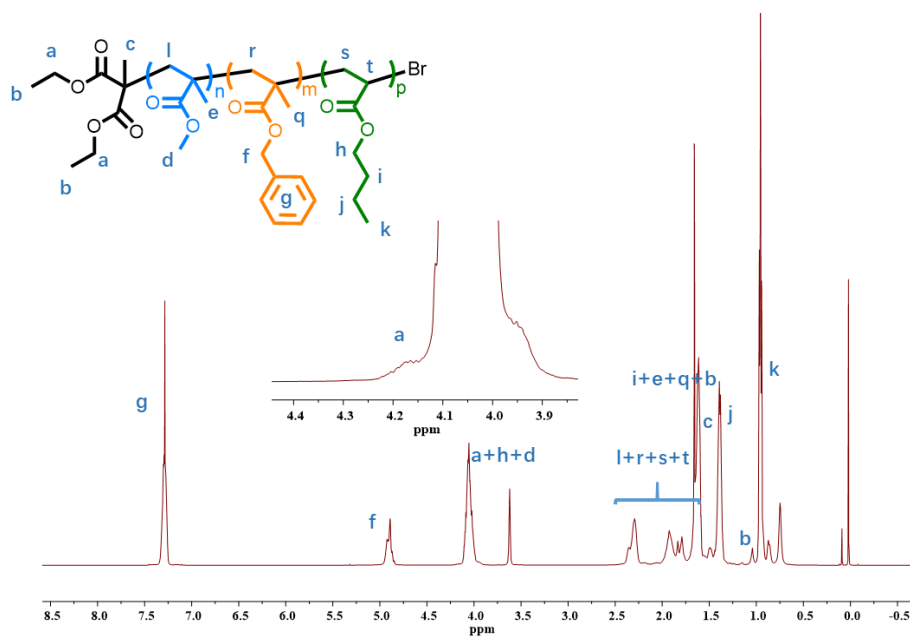

**Supplementary Figure 14 |  $^1\text{H}$  NMR spectrum of PMMA-*b*-PBnMA-*b*-PBA in  $\text{CDCl}_3$ .**

## 9. NMR spectra of photocatalysts

5a:

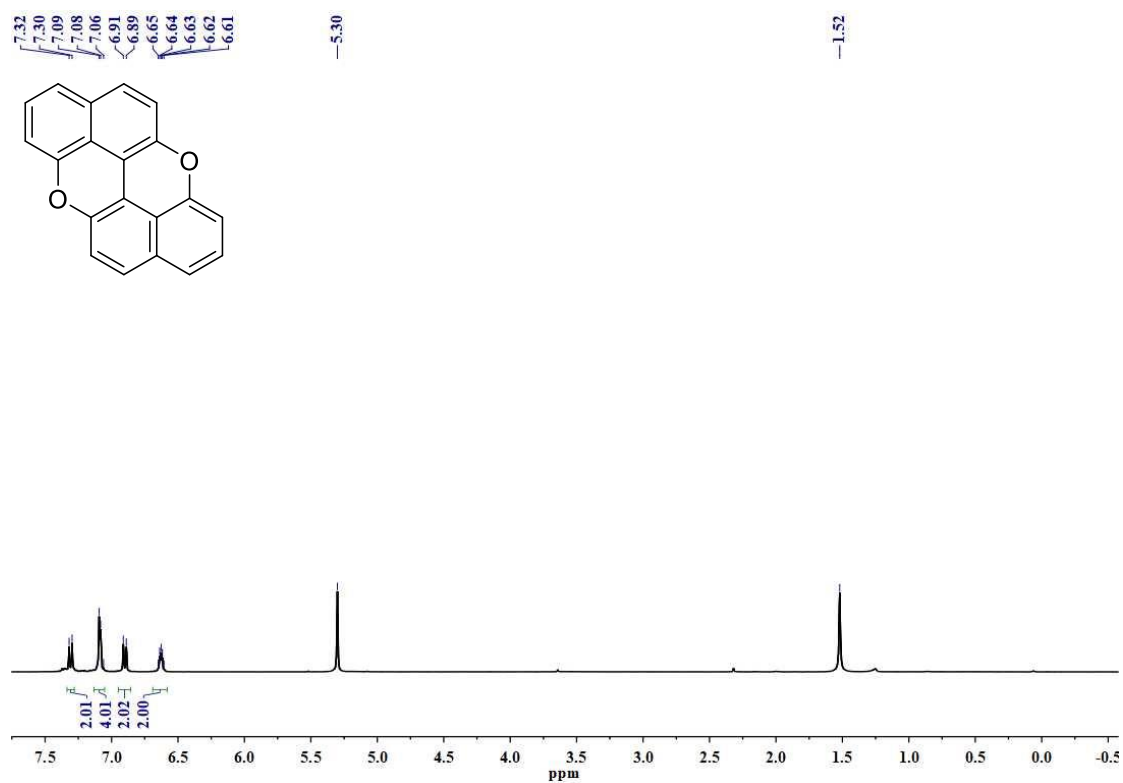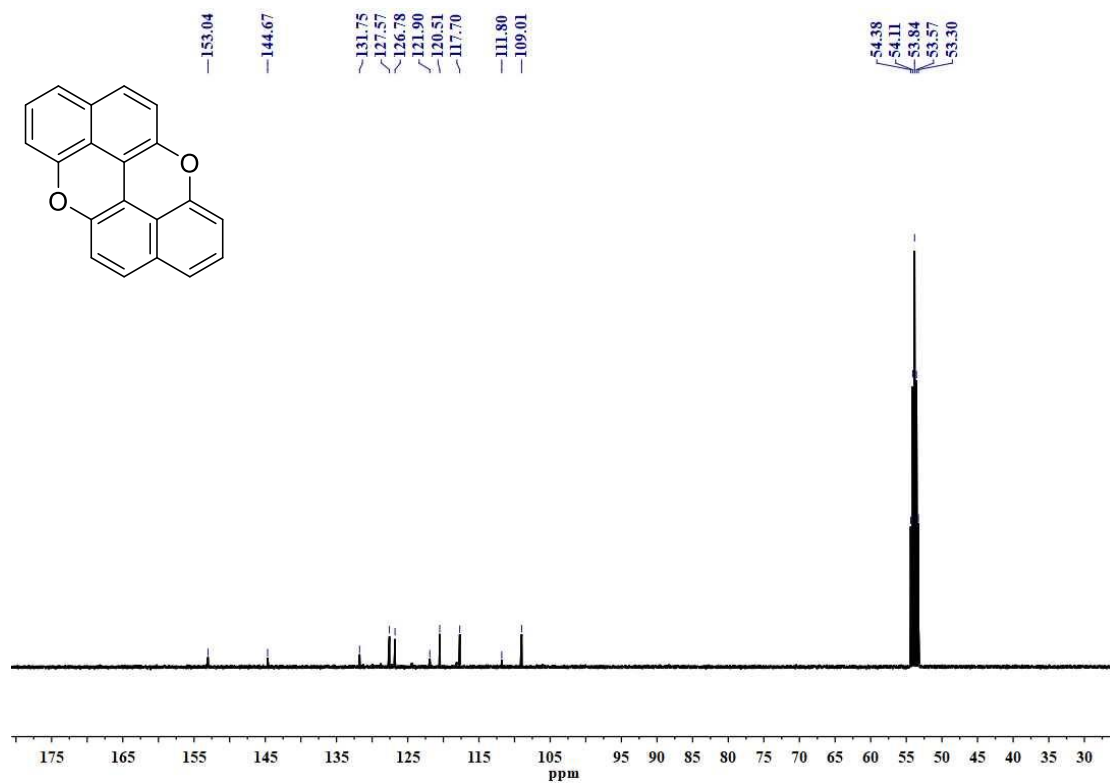

5b:

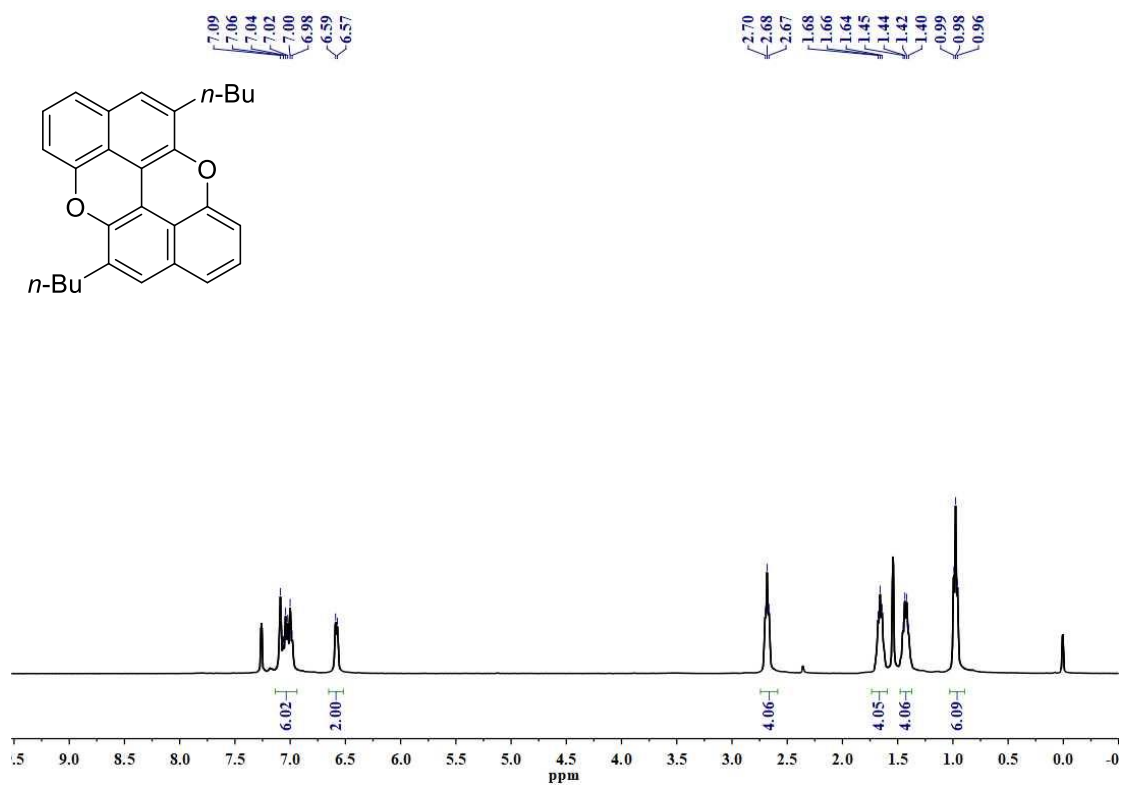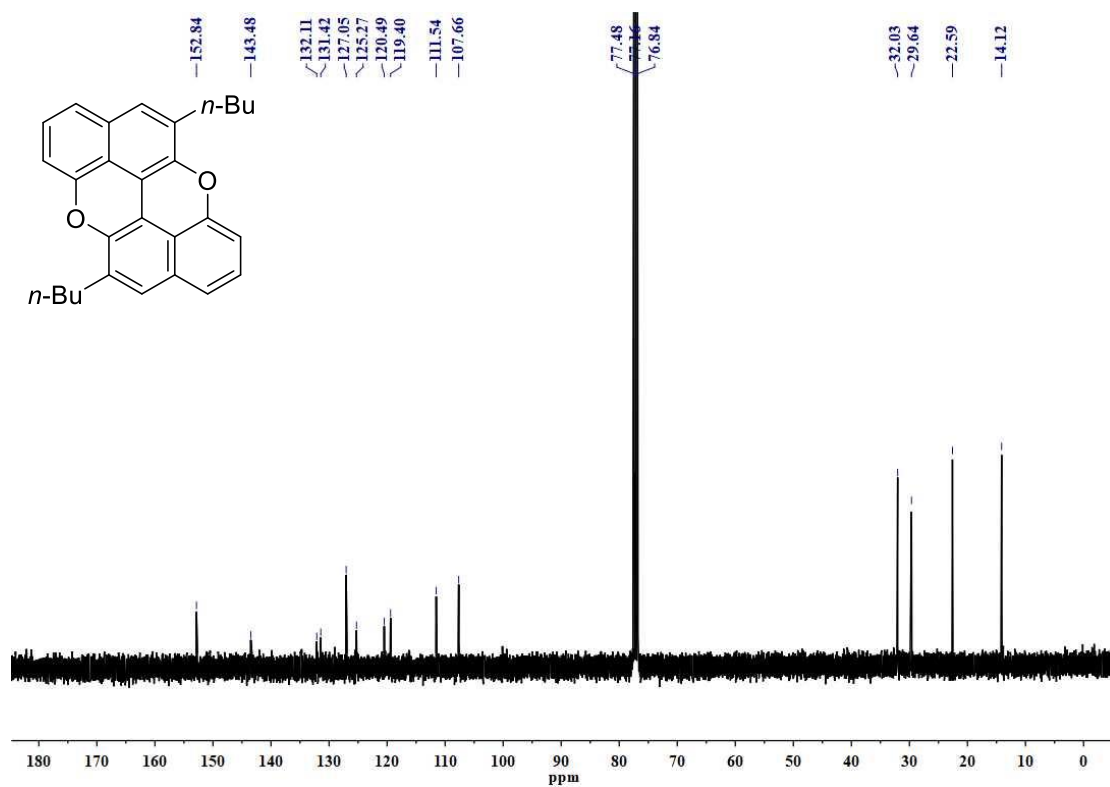

5c:

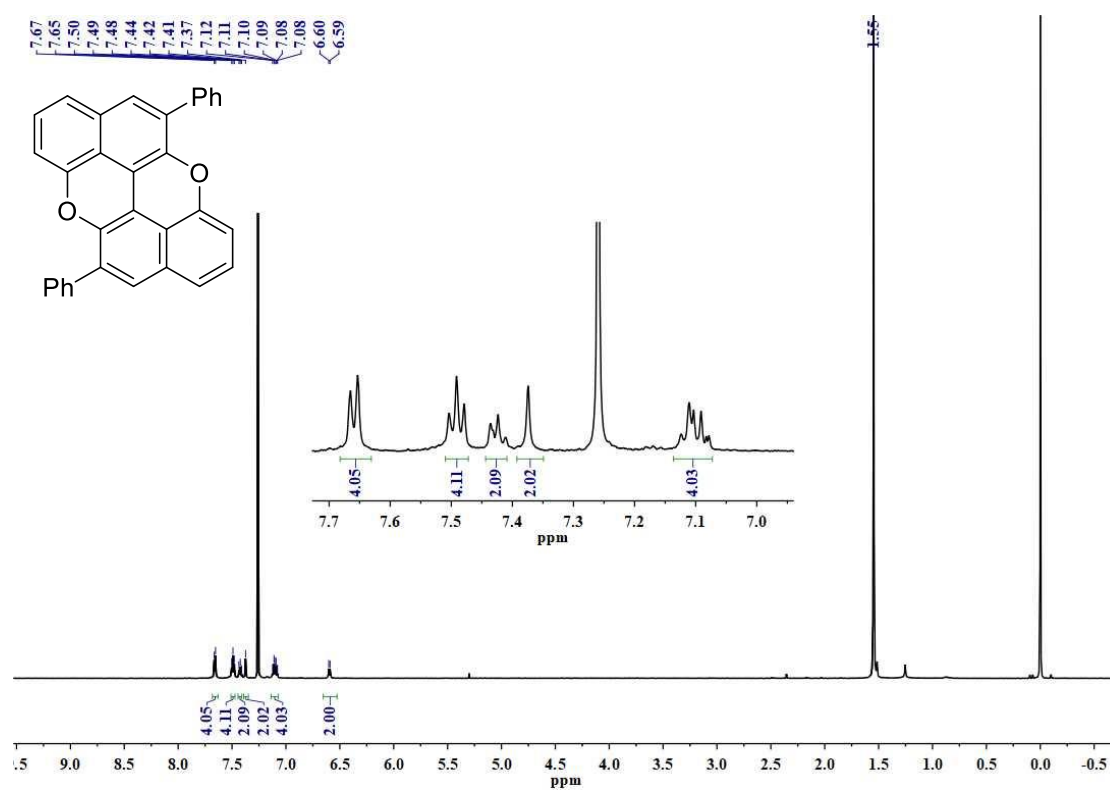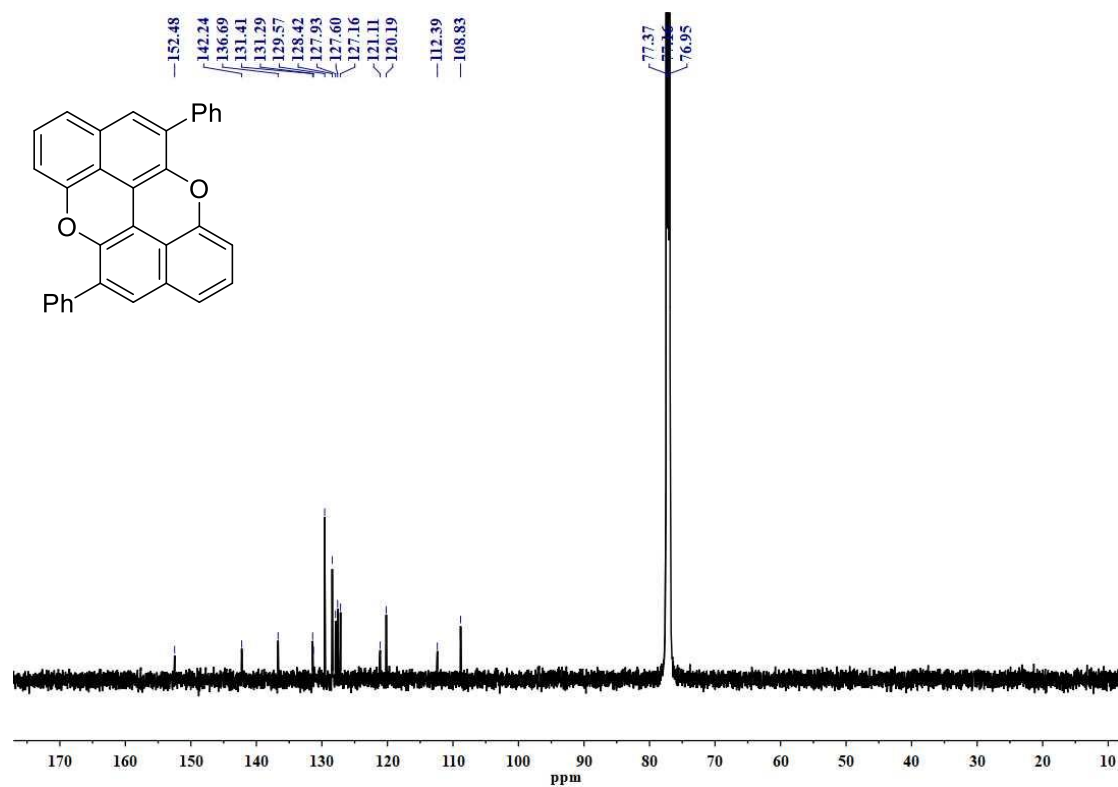

5d:

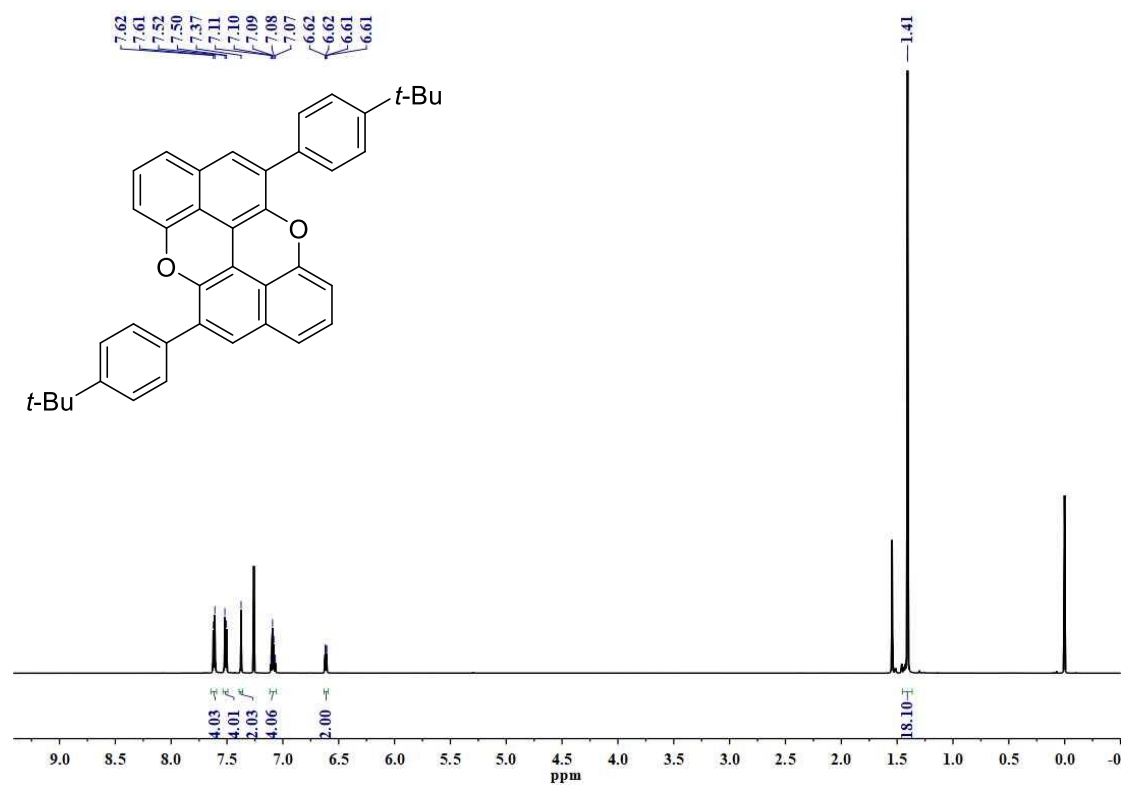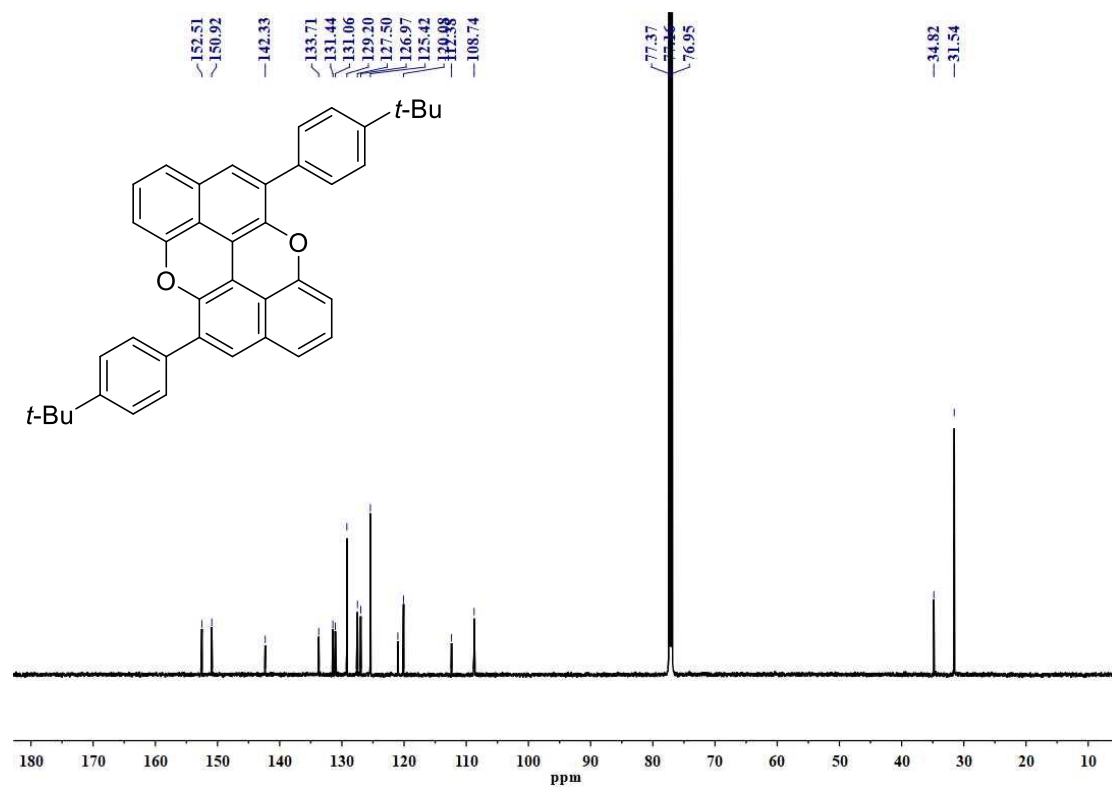

## 10. Fluorescence quenching study

The solutions of ODA **5a** were excited at 449 nm and the fluorescence spectra were recorded between 465 and 650 nm. The emission of a 0.20 mM solution of **5a** in DCM was measured at varying volumes of diethyl 2-bromo-2-methylmalonate (DBMM, 500 mM). As shown in Figures S15 a significant fluorescence quenching by addition of DBMM was observed. The emission of a 0.20 mM solution of **5a** in DCM was also measured at varying volume of methyl methacrylate (MMA) (1 M). As shown in Figures S18 no significant quenching of the emission of **5a** was observed.

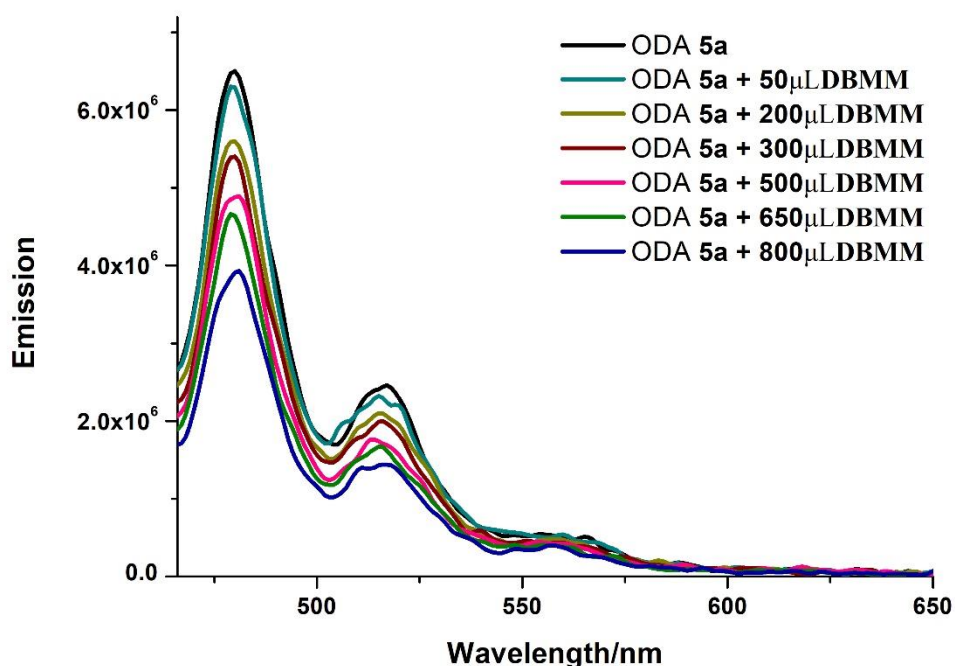

Supplementary Figure 15 | Fluorescence quenching of ODA **5a** by DBMM.

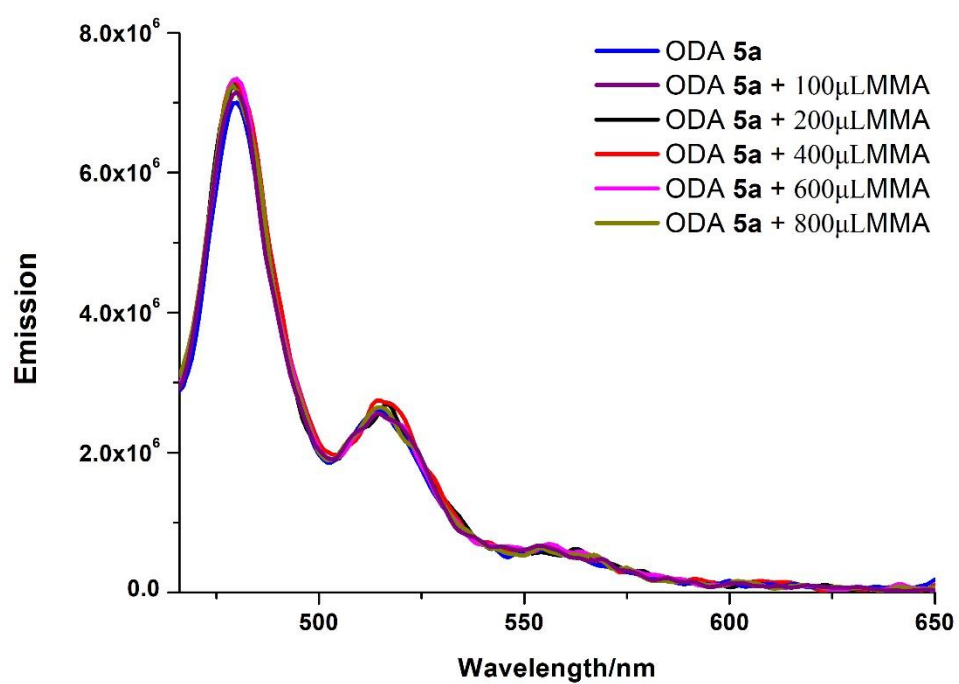

**Supplementary Figure 16 | Fluorescence quenching of ODA 5a by MMA.**



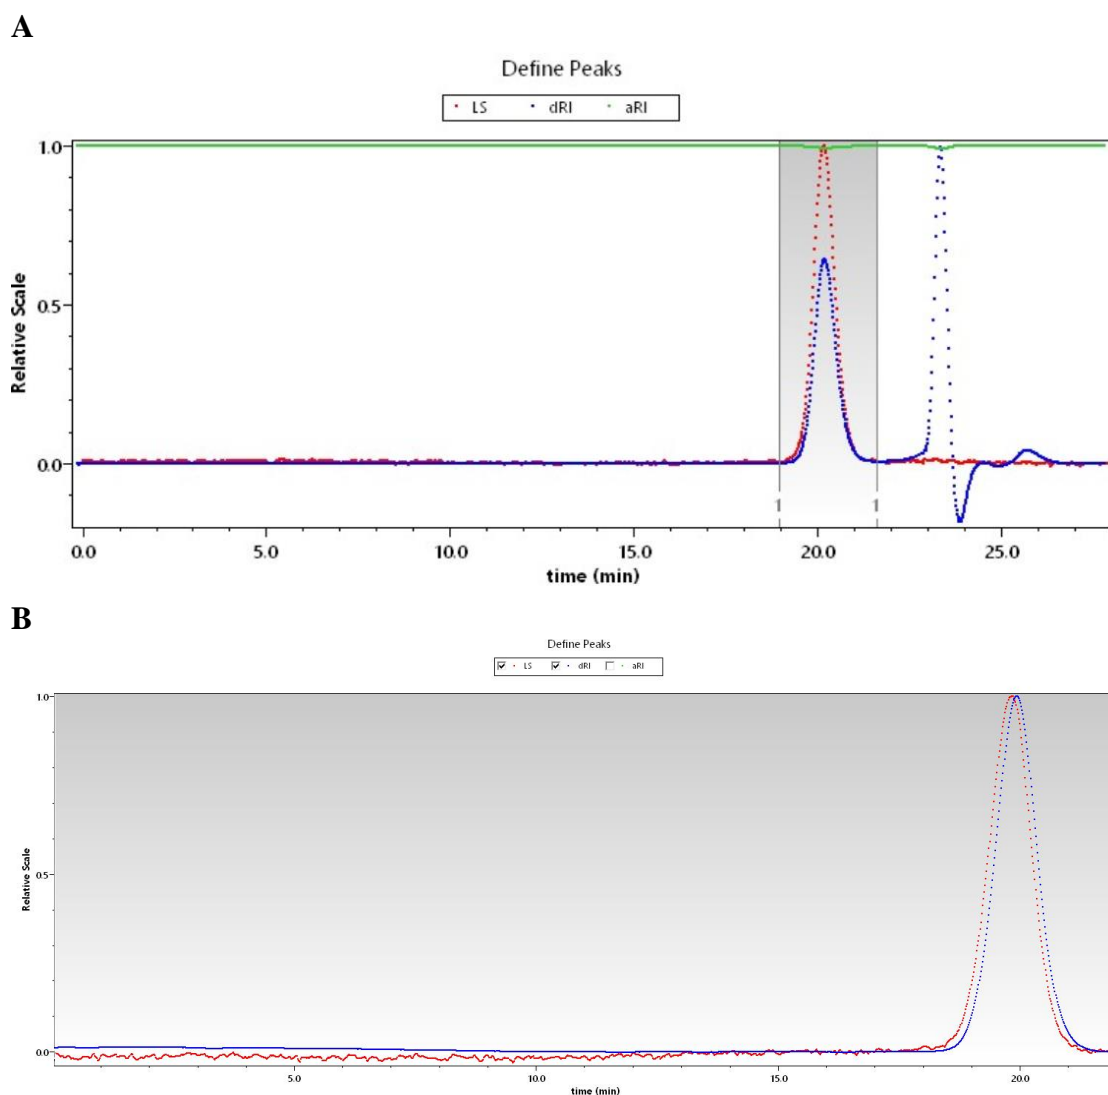

**Supplementary Figure 17** | A, Example of how peaks were picked for molecular weight characterization in ASTRA 6. B, This chromatogram is of PMMA polymerized by **ODA 5d** at 10 ppm at the 12-hour time point. (Table 2, Entry 5)

## 11. The color of PMMA products

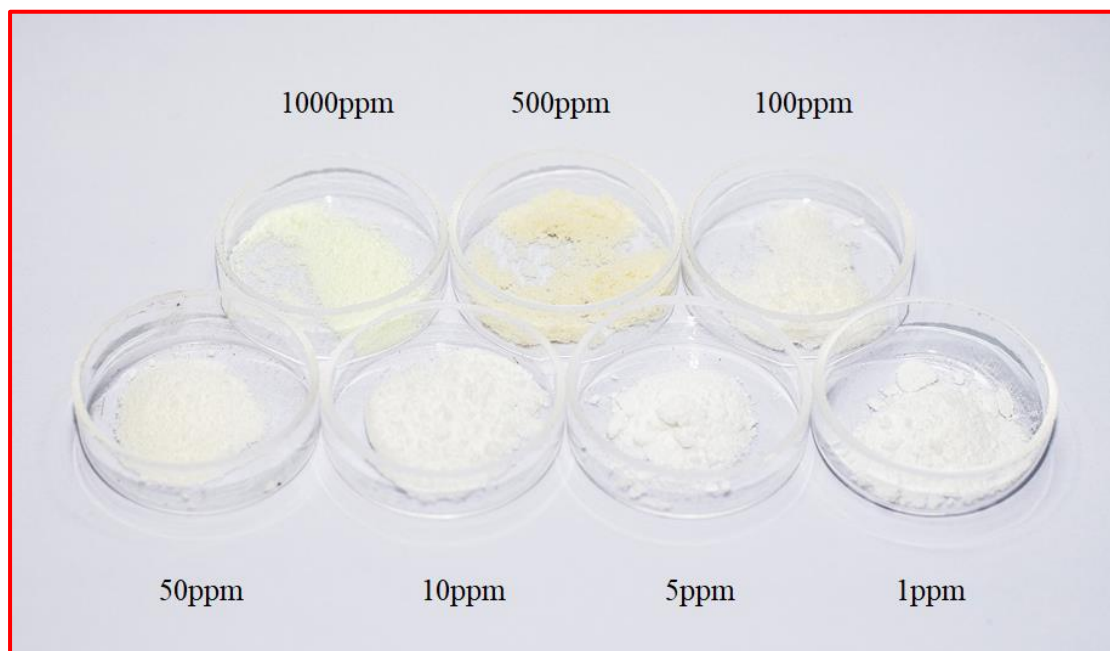

**Supplementary Figure 18 | The color of PMMA products obtained with different levels of photocatalyst.**

## 12. Computational detail

All of the theoretical calculations were performed in Gaussian09 package. Geometries optimization calculations were carried out by a meta-GGA hybrid functional PBE0 with 6-31G\* basis set for all atoms. Vibrational frequencies were calculated analytically at the same level to obtain the thermodynamic corrections. The CPCM solvation model using the self-consistent reaction field (SCRF) method with the solvents of acetonitrile was employed to account the solvent effect. The changes in Gibbs free energy are reported in the content. The redox potentials of triplet state were calculated by the energy differences of triplet states and cation radical,

$$\Delta G_{\text{red}}(\text{PC}^+/\text{}^3\text{PC}^*) = G(\text{}^3\text{PC}^*) - G(\text{PC}^{\bullet+}),$$

with the corrections to SHE (−4.48V) and to SCE (−0.244V) in acetonitrile,<sup>4</sup>

$$E^0(\text{PC}^+/\text{}^3\text{PC}^*) = \Delta G_{\text{red}}(\text{PC}^+/\text{}^3\text{PC}^*) / 23.06 - 4.48 - 0.244, \text{ in V.}$$

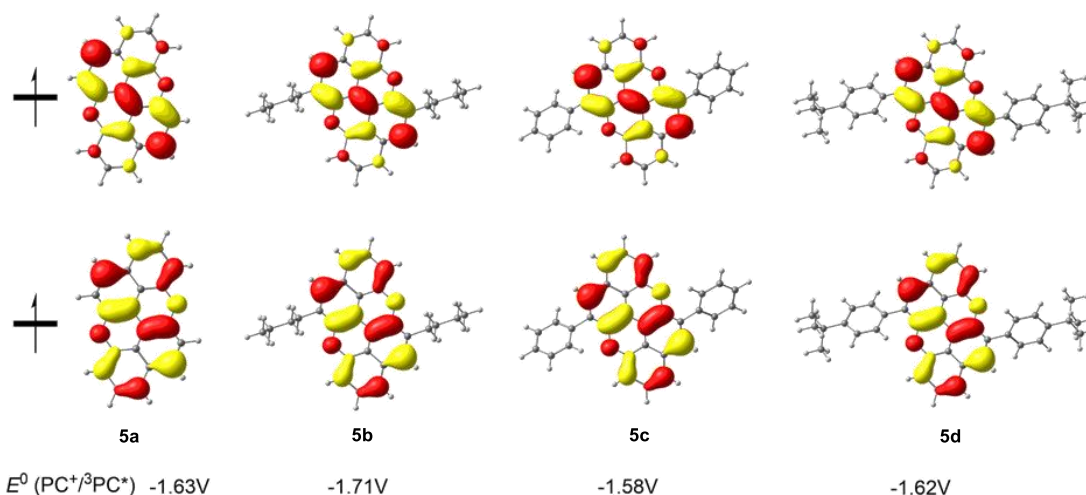

**Supplementary Figure 19 | The SOMOs and redox potentials of triplet states for 5a-5d.**

## Computational geometries and energies

5a, R=H

Ground state

|   |           |           |           |
|---|-----------|-----------|-----------|
| C | 4.476932  | 0.833126  | 0.000072  |
| C | 3.424481  | 1.776056  | 0.000072  |
| C | 2.123351  | 1.329281  | 0.000039  |
| C | 1.851718  | -0.061276 | 0.000008  |
| C | 2.908173  | -1.007974 | 0.000010  |
| C | 4.240474  | -0.523602 | 0.000042  |
| C | 0.513032  | -0.497476 | -0.000023 |
| C | 0.197993  | -1.835708 | -0.000048 |
| C | 1.228814  | -2.795014 | -0.000047 |
| C | 2.545802  | -2.384587 | -0.000019 |
| C | -0.513032 | 0.497476  | -0.000011 |
| C | -0.197993 | 1.835708  | 0.000023  |
| C | -1.228814 | 2.795014  | 0.000046  |
| C | -2.545802 | 2.384587  | 0.000035  |
| C | -2.908173 | 1.007974  | 0.000003  |
| C | -1.851718 | 0.061276  | -0.000020 |
| C | -4.240474 | 0.523602  | -0.000008 |
| C | -4.476932 | -0.833126 | -0.000037 |
| C | -3.424481 | -1.776056 | -0.000058 |
| C | -2.123351 | -1.329281 | -0.000050 |
| O | -1.107937 | -2.259388 | -0.000076 |
| O | 1.107937  | 2.259388  | 0.000034  |
| H | 5.499135  | 1.200697  | 0.000098  |
| H | 3.629380  | 2.841772  | 0.000096  |
| H | 5.066337  | -1.229361 | 0.000044  |
| H | 3.335423  | -3.130967 | -0.000019 |
| H | -3.335423 | 3.130967  | 0.000053  |
| H | -5.066337 | 1.229361  | 0.000008  |
| H | -5.499135 | -1.200697 | -0.000044 |
| H | -3.629380 | -2.841772 | -0.000081 |
| H | -0.972377 | 3.849928  | 0.000072  |
| H | 0.972377  | -3.849928 | -0.000068 |

Energies (0K) = -917.604574681

Energies (0K) + ZPE = -917.361437

Enthalpies (298K) = -917.346988

Free Energies (298K) = -917.400918

Triplet state

|   |          |           |           |
|---|----------|-----------|-----------|
| C | 4.483797 | 0.819009  | 0.000070  |
| C | 3.455153 | 1.763519  | 0.000067  |
| C | 2.139009 | 1.307462  | 0.000036  |
| C | 1.860155 | -0.060942 | 0.000008  |
| C | 2.898960 | -1.025245 | 0.000011  |
| C | 4.224193 | -0.549531 | 0.000042  |
| C | 0.491951 | -0.474209 | -0.000020 |

|   |           |           |           |
|---|-----------|-----------|-----------|
| C | 0.174951  | -1.869239 | -0.000046 |
| C | 1.181256  | -2.812707 | -0.000043 |
| C | 2.530149  | -2.407227 | -0.000015 |
| C | -0.491951 | 0.474209  | -0.000009 |
| C | -0.174951 | 1.869239  | 0.000026  |
| C | -1.181256 | 2.812707  | 0.000050  |
| C | -2.530149 | 2.407227  | 0.000039  |
| C | -2.898960 | 1.025245  | 0.000004  |
| C | -1.860155 | 0.060942  | -0.000021 |
| C | -4.224193 | 0.549531  | -0.000007 |
| C | -4.483797 | -0.819009 | -0.000040 |
| C | -3.455153 | -1.763519 | -0.000063 |
| C | -2.139009 | -1.307462 | -0.000052 |
| O | -1.140376 | -2.249391 | -0.000079 |
| O | 1.140376  | 2.249391  | 0.000031  |
| H | 5.513127  | 1.165651  | 0.000094  |
| H | 3.659424  | 2.828974  | 0.000089  |
| H | 5.048071  | -1.257892 | 0.000046  |
| H | 3.312626  | -3.159299 | -0.000012 |
| H | -3.312626 | 3.159299  | 0.000059  |
| H | -5.048071 | 1.257892  | 0.000010  |
| H | -5.513127 | -1.165651 | -0.000048 |
| H | -3.659424 | -2.828974 | -0.000089 |
| H | -0.924528 | 3.867538  | 0.000078  |
| H | 0.924528  | -3.867538 | -0.000062 |

Energies (0K) = -917.536315066  
 Energies (0K) + ZPE = -917.296855  
 Enthalpies (298K) = -917.282005  
 Free Energies (298K) = -917.337599

#### Cation radical

|   |           |           |           |
|---|-----------|-----------|-----------|
| C | 4.463950  | 0.831372  | 0.000057  |
| C | 3.428068  | 1.773552  | 0.000065  |
| C | 2.119218  | 1.320037  | 0.000043  |
| C | 1.845551  | -0.061125 | 0.000012  |
| C | 2.892884  | -1.012296 | 0.000004  |
| C | 4.216736  | -0.536493 | 0.000026  |
| C | 0.506808  | -0.486142 | -0.000008 |
| C | 0.182833  | -1.846278 | -0.000037 |
| C | 1.207502  | -2.808473 | -0.000047 |
| C | 2.522259  | -2.392449 | -0.000027 |
| C | -0.506808 | 0.486142  | 0.000004  |
| C | -0.182833 | 1.846278  | 0.000035  |
| C | -1.207502 | 2.808473  | 0.000047  |
| C | -2.522259 | 2.392449  | 0.000029  |
| C | -2.892884 | 1.012296  | -0.000002 |
| C | -1.845551 | 0.061125  | -0.000014 |
| C | -4.216736 | 0.536493  | -0.000023 |
| C | -4.463950 | -0.831372 | -0.000053 |

|   |           |           |           |
|---|-----------|-----------|-----------|
| C | -3.428068 | -1.773552 | -0.000064 |
| C | -2.119218 | -1.320037 | -0.000045 |
| O | -1.107481 | -2.239405 | -0.000056 |
| O | 1.107481  | 2.239405  | 0.000052  |
| H | 5.489171  | 1.187012  | 0.000074  |
| H | 3.632702  | 2.838583  | 0.000089  |
| H | 5.042832  | -1.240560 | 0.000021  |
| H | 3.310725  | -3.139168 | -0.000034 |
| H | -3.310725 | 3.139168  | 0.000038  |
| H | -5.042832 | 1.240560  | -0.000015 |
| H | -5.489171 | -1.187012 | -0.000068 |
| H | -3.632702 | -2.838583 | -0.000088 |
| H | -0.950796 | 3.861995  | 0.000071  |
| H | 0.950796  | -3.861995 | -0.000069 |

Energies (0K) = -917.428082074  
 Energies (0K) + ZPE = -917.183970  
 Enthalpies (298K) = -917.169601  
 Free Energies (298K) = -917.223952

#### 5b, R=<sup>n</sup>Bu

##### Ground state

|   |           |           |           |
|---|-----------|-----------|-----------|
| C | -0.625764 | -4.508834 | -0.474126 |
| C | -1.617944 | -3.502706 | -0.468026 |
| C | -1.231254 | -2.182011 | -0.462388 |
| C | 0.143504  | -1.846521 | -0.461621 |
| C | 1.139397  | -2.854534 | -0.468288 |
| C | 0.718584  | -4.208391 | -0.474999 |
| C | 0.521208  | -0.490490 | -0.457477 |
| C | 1.844132  | -0.117778 | -0.456589 |
| C | 2.871215  | -1.094863 | -0.463049 |
| C | 2.495386  | -2.426846 | -0.470036 |
| C | -0.521195 | 0.490514  | -0.457468 |
| C | -1.844119 | 0.117802  | -0.456626 |
| C | -2.871202 | 1.094887  | -0.463070 |
| C | -2.495373 | 2.426870  | -0.469991 |
| C | -1.139384 | 2.854558  | -0.468193 |
| C | -0.143491 | 1.846545  | -0.461545 |
| C | -0.718570 | 4.208415  | -0.474836 |
| C | 0.625777  | 4.508859  | -0.473922 |
| C | 1.617957  | 3.502730  | -0.467843 |
| C | 1.231267  | 2.182035  | -0.462268 |
| O | 2.204601  | 1.209456  | -0.456565 |
| O | -2.204588 | -1.209431 | -0.456667 |
| H | -0.944016 | -5.547636 | -0.478607 |
| H | -2.672857 | -3.757751 | -0.468210 |
| H | 1.462303  | -5.000490 | -0.480194 |
| H | 3.275092  | -3.185485 | -0.479884 |

|   |           |           |           |
|---|-----------|-----------|-----------|
| H | -3.275079 | 3.185510  | -0.479827 |
| H | -1.462290 | 5.000515  | -0.480015 |
| H | 0.944030  | 5.547660  | -0.478352 |
| H | 2.672870  | 3.757775  | -0.467993 |
| C | 4.316616  | -0.680715 | -0.432042 |
| H | 4.933633  | -1.515824 | -0.784463 |
| C | -4.316604 | 0.680737  | -0.432122 |
| H | -4.933611 | 1.515863  | -0.784520 |
| H | -4.475777 | -0.151452 | -1.129567 |
| H | 4.475810  | 0.151508  | -1.129442 |
| C | 4.788418  | -0.256617 | 0.964033  |
| H | 4.161626  | 0.570202  | 1.323430  |
| H | 4.635879  | -1.090878 | 1.662652  |
| C | 6.253242  | 0.167749  | 0.984843  |
| H | 6.398373  | 0.998417  | 0.280160  |
| H | 6.875207  | -0.659232 | 0.614782  |
| C | 6.727594  | 0.584579  | 2.371695  |
| H | 6.623621  | -0.238722 | 3.088541  |
| H | 7.780591  | 0.886683  | 2.360960  |
| H | 6.141283  | 1.429967  | 2.751249  |
| C | -4.788446 | 0.256570  | 0.963918  |
| H | -4.161661 | -0.570262 | 1.323295  |
| H | -4.635932 | 1.090799  | 1.662581  |
| C | -6.253268 | -0.167804 | 0.984663  |
| H | -6.875226 | 0.659192  | 0.614623  |
| H | -6.398373 | -0.998438 | 0.279935  |
| C | -6.727661 | -0.584704 | 2.371480  |
| H | -7.780656 | -0.886815 | 2.360696  |
| H | -6.141357 | -1.430106 | 2.751012  |
| H | -6.623718 | 0.238563  | 3.088370  |

Energies (0K) = -1231.73578137

Energies (0K) + ZPE = -1231.264061

Enthalpies (298K) = -1231.237951

Free Energies (298K) = -1231.319803

Triplet state

|   |           |           |           |
|---|-----------|-----------|-----------|
| C | -0.547838 | -4.523226 | -0.469459 |
| C | -1.554090 | -3.554647 | -0.467832 |
| C | -1.179255 | -2.212887 | -0.468349 |
| C | 0.168804  | -1.852058 | -0.469674 |
| C | 1.195034  | -2.827881 | -0.470631 |
| C | 0.802314  | -4.180240 | -0.471112 |
| C | 0.503144  | -0.463206 | -0.470157 |
| C | 1.878163  | -0.067193 | -0.469238 |
| C | 2.899510  | -1.004448 | -0.473485 |
| C | 2.549858  | -2.373394 | -0.473601 |
| C | -0.503134 | 0.463239  | -0.470151 |
| C | -1.878153 | 0.067226  | -0.469278 |
| C | -2.899500 | 1.004482  | -0.473515 |

|   |           |           |           |
|---|-----------|-----------|-----------|
| C | -2.549848 | 2.373427  | -0.473570 |
| C | -1.195024 | 2.827914  | -0.470551 |
| C | -0.168794 | 1.852091  | -0.469607 |
| C | -0.802304 | 4.180273  | -0.470973 |
| C | 0.547848  | 4.523259  | -0.469277 |
| C | 1.554100  | 3.554680  | -0.467663 |
| C | 1.179266  | 2.212920  | -0.468238 |
| O | 2.177578  | 1.272437  | -0.465429 |
| O | -2.177568 | -1.272404 | -0.465529 |
| H | -0.830396 | -5.572114 | -0.469411 |
| H | -2.604978 | -3.824393 | -0.466659 |
| H | 1.559807  | -4.959433 | -0.472407 |
| H | 3.346301  | -3.112719 | -0.480933 |
| H | -3.346290 | 3.112752  | -0.480893 |
| H | -1.559798 | 4.959465  | -0.472256 |
| H | 0.830405  | 5.572147  | -0.469184 |
| H | 2.604987  | 3.824426  | -0.466456 |
| C | 4.342312  | -0.576802 | -0.439171 |
| H | 4.962785  | -1.384757 | -0.846284 |
| C | -4.342302 | 0.576832  | -0.439257 |
| H | -4.962767 | 1.384811  | -0.846333 |
| H | -4.487126 | -0.292982 | -1.092520 |
| H | 4.487152  | 0.293053  | -1.092375 |
| C | 4.832436  | -0.225495 | 0.970447  |
| H | 4.210253  | 0.583050  | 1.377548  |
| H | 4.685486  | -1.092509 | 1.629451  |
| C | 6.297948  | 0.196241  | 0.998200  |
| H | 6.438701  | 1.056229  | 0.328492  |
| H | 6.915720  | -0.614616 | 0.587432  |
| C | 6.784915  | 0.552698  | 2.397477  |
| H | 6.683884  | -0.299858 | 3.079773  |
| H | 7.838733  | 0.852246  | 2.391489  |
| H | 6.204158  | 1.382792  | 2.817330  |
| C | -4.832458 | 0.225434  | 0.970327  |
| H | -4.210278 | -0.583130 | 1.377394  |
| H | -4.685533 | 1.092410  | 1.629387  |
| C | -6.297967 | -0.196317 | 0.998017  |
| H | -6.915736 | 0.614558  | 0.587282  |
| H | -6.438693 | -1.056266 | 0.328252  |
| C | -6.784967 | -0.552867 | 2.397259  |
| H | -7.838780 | -0.852429 | 2.391223  |
| H | -6.204209 | -1.382978 | 2.817077  |
| H | -6.683967 | 0.299649  | 3.079610  |

Energies (0K) = -1231.66569528  
 Energies (0K) + ZPE = -1231.197946  
 Enthalpies (298K) = -1231.171331  
 Free Energies (298K) = -1231.255630

Cation radical



|   |           |           |           |
|---|-----------|-----------|-----------|
| C | -0.629411 | -4.494701 | -0.474406 |
| C | -1.619306 | -3.504215 | -0.469829 |
| C | -1.225331 | -2.175851 | -0.465814 |
| C | 0.140489  | -1.840357 | -0.465020 |
| C | 1.139664  | -2.839677 | -0.470054 |
| C | 0.725777  | -4.184412 | -0.475346 |
| C | 0.508855  | -0.485337 | -0.462395 |
| C | 1.853631  | -0.104582 | -0.460905 |
| C | 2.883574  | -1.074939 | -0.465438 |
| C | 2.499309  | -2.404962 | -0.471386 |
| C | -0.508840 | 0.485360  | -0.462384 |
| C | -1.853617 | 0.104604  | -0.460941 |
| C | -2.883560 | 1.074961  | -0.465458 |
| C | -2.499294 | 2.404985  | -0.471338 |
| C | -1.139649 | 2.839699  | -0.469955 |
| C | -0.140474 | 1.840379  | -0.464942 |
| C | -0.725763 | 4.184435  | -0.475179 |
| C | 0.629425  | 4.494724  | -0.474198 |
| C | 1.619320  | 3.504237  | -0.469643 |
| C | 1.225345  | 2.175874  | -0.465692 |
| O | 2.186384  | 1.205275  | -0.461957 |
| O | -2.186370 | -1.205253 | -0.462058 |
| H | -0.936514 | -5.535675 | -0.477825 |
| H | -2.673724 | -3.758073 | -0.470061 |
| H | 1.466950  | -4.977675 | -0.479649 |
| H | 3.276860  | -3.164760 | -0.479958 |
| H | -3.276846 | 3.164783  | -0.479897 |
| H | -1.466936 | 4.977698  | -0.479464 |
| H | 0.936528  | 5.535698  | -0.477566 |
| H | 2.673738  | 3.758096  | -0.469841 |
| C | 4.326809  | -0.658869 | -0.432280 |
| H | 4.940799  | -1.489056 | -0.798551 |
| C | -4.326796 | 0.658890  | -0.432361 |
| H | -4.940775 | 1.489093  | -0.798613 |
| H | -4.481117 | -0.181277 | -1.120457 |
| H | 4.481151  | 0.181328  | -1.120333 |
| C | 4.798293  | -0.255687 | 0.971084  |
| H | 4.175085  | 0.566960  | 1.346118  |
| H | 4.646989  | -1.100139 | 1.656897  |
| C | 6.263805  | 0.166384  | 0.990521  |
| H | 6.406985  | 1.006039  | 0.296534  |
| H | 6.882479  | -0.656990 | 0.607904  |
| C | 6.741683  | 0.563832  | 2.381678  |
| H | 6.638338  | -0.268679 | 3.087702  |
| H | 7.795149  | 0.863608  | 2.370770  |
| H | 6.158570  | 1.405644  | 2.773593  |
| C | -4.798323 | 0.255644  | 0.970970  |
| H | -4.175124 | -0.567017 | 1.345988  |
| H | -4.647044 | 1.100066  | 1.656825  |

|   |           |           |          |
|---|-----------|-----------|----------|
| C | -6.263834 | -0.166435 | 0.990340 |
| H | -6.882499 | 0.656953  | 0.607739 |
| H | -6.406986 | -1.006061 | 0.296312 |
| C | -6.741757 | -0.563945 | 2.381465 |
| H | -7.795220 | -0.863728 | 2.370507 |
| H | -6.158651 | -1.405769 | 2.773364 |
| H | -6.638443 | 0.268536  | 3.087527 |

Energies (0K) = -1231.56124762  
 Energies (0K) + ZPE = -1231.088598  
 Enthalpies (298K) = -1231.062531  
 Free Energies (298K) = -1231.145023

### 5c, R=Ph

#### Ground state

|   |           |           |           |
|---|-----------|-----------|-----------|
| C | -0.165642 | -4.550174 | -0.034578 |
| C | -1.252917 | -3.648259 | -0.018468 |
| C | -1.000393 | -2.295773 | 0.001115  |
| C | 0.331744  | -1.822033 | 0.005436  |
| C | 1.422047  | -2.726230 | -0.016250 |
| C | 1.141162  | -4.116028 | -0.033473 |
| C | 0.570316  | -0.434703 | 0.024953  |
| C | 1.848915  | 0.073663  | 0.026339  |
| C | 2.969796  | -0.801040 | 0.010275  |
| C | 2.726098  | -2.166914 | -0.012826 |
| C | -0.570318 | 0.434704  | 0.024940  |
| C | -1.848917 | -0.073663 | 0.026259  |
| C | -2.969797 | 0.801041  | 0.010170  |
| C | -2.726098 | 2.166916  | -0.012888 |
| C | -1.422046 | 2.726231  | -0.016243 |
| C | -0.331744 | 1.822034  | 0.005466  |
| C | -1.141161 | 4.116031  | -0.033421 |
| C | 0.165643  | 4.550176  | -0.034461 |
| C | 1.252918  | 3.648261  | -0.018327 |
| C | 1.000393  | 2.295774  | 0.001214  |
| O | 2.066813  | 1.428626  | 0.015261  |
| O | -2.066814 | -1.428625 | 0.015139  |
| C | 4.362788  | -0.295231 | 0.003480  |
| C | -4.362788 | 0.295231  | 0.003307  |
| C | 5.305415  | -0.863793 | -0.863715 |
| C | 6.628651  | -0.432760 | -0.860157 |
| C | 7.033369  | 0.575656  | 0.011446  |
| C | 6.104593  | 1.149217  | 0.878049  |
| C | 4.780887  | 0.721089  | 0.873770  |
| C | -5.305381 | 0.863809  | -0.863916 |
| C | -6.628616 | 0.432774  | -0.860421 |
| C | -7.033368 | -0.575661 | 0.011145  |
| C | -6.104627 | -1.149238 | 0.877775  |

|   |           |           |           |
|---|-----------|-----------|-----------|
| C | -4.780921 | -0.721107 | 0.873558  |
| H | -0.378124 | -5.615419 | -0.048932 |
| H | -2.277239 | -4.006577 | -0.021649 |
| H | 1.961596  | -4.828024 | -0.047257 |
| H | 3.576480  | -2.843761 | -0.006921 |
| H | -3.576480 | 2.843763  | -0.007003 |
| H | -1.961594 | 4.828026  | -0.047222 |
| H | 0.378126  | 5.615422  | -0.048780 |
| H | 2.277240  | 4.006579  | -0.021457 |
| H | 4.991862  | -1.638441 | -1.558711 |
| H | 7.342503  | -0.882302 | -1.545090 |
| H | 6.412375  | 1.932650  | 1.565391  |
| H | 4.068264  | 1.168909  | 1.558982  |
| H | -4.991801 | 1.638472  | -1.558882 |
| H | -7.342441 | 0.882328  | -1.545374 |
| H | -6.412436 | -1.932685 | 1.565089  |
| H | -4.068325 | -1.168940 | 1.558792  |
| H | 8.065741  | 0.914448  | 0.014429  |
| H | -8.065740 | -0.914455 | 0.014079  |

Energies (0K) = -1379.17533430  
 Energies (0K) + ZPE = -1378.769235  
 Enthalpies (298K) = -1378.745064  
 Free Energies (298K) = -1378.821956

#### Triplet state

|   |           |           |           |
|---|-----------|-----------|-----------|
| C | -0.201636 | 4.552508  | 0.021065  |
| C | -1.277195 | 3.662226  | 0.011678  |
| C | -1.001950 | 2.296508  | -0.007640 |
| C | 0.312683  | 1.833463  | -0.018679 |
| C | 1.407710  | 2.730122  | -0.002595 |
| C | 1.118509  | 4.108774  | 0.014071  |
| C | 0.539912  | 0.423749  | -0.036653 |
| C | 1.878787  | -0.080526 | -0.036913 |
| C | 2.971683  | 0.781626  | -0.024109 |
| C | 2.721013  | 2.177762  | -0.007218 |
| C | -0.539914 | -0.423748 | -0.036640 |
| C | -1.878789 | 0.080526  | -0.036833 |
| C | -2.971685 | -0.781625 | -0.024003 |
| C | -2.721013 | -2.177762 | -0.007156 |
| C | -1.407710 | -2.730122 | -0.002599 |
| C | -0.312684 | -1.833463 | -0.018708 |
| C | -1.118508 | -4.108775 | 0.014024  |
| C | 0.201637  | -4.552509 | 0.020953  |
| C | 1.277196  | -3.662227 | 0.011542  |
| C | 1.001950  | -2.296508 | -0.007734 |
| O | 2.066621  | -1.434811 | -0.014961 |
| O | -2.066621 | 1.434812  | -0.014842 |
| C | 4.369710  | 0.294049  | -0.002732 |

|   |           |           |           |
|---|-----------|-----------|-----------|
| C | -4.369711 | -0.294049 | -0.002558 |
| C | 5.312662  | 0.919260  | 0.826375  |
| C | 6.639556  | 0.500767  | 0.844360  |
| C | 7.053376  | -0.552048 | 0.031131  |
| C | 6.127435  | -1.180428 | -0.799696 |
| C | 4.800235  | -0.763537 | -0.817568 |
| C | -5.312630 | -0.919283 | 0.826568  |
| C | -6.639523 | -0.500790 | 0.844617  |
| C | -7.053375 | 0.552047  | 0.031434  |
| C | -6.127467 | 1.180450  | -0.799412 |
| C | -4.800267 | 0.763560  | -0.817348 |
| H | -0.404366 | 5.619455  | 0.034987  |
| H | -2.305321 | 4.008194  | 0.019404  |
| H | 1.933077  | 4.827771  | 0.024200  |
| H | 3.568534  | 2.855648  | -0.029899 |
| H | -3.568535 | -2.855648 | -0.029818 |
| H | -1.933076 | -4.827772 | 0.024170  |
| H | 0.404368  | -5.619456 | 0.034844  |
| H | 2.305322  | -4.008195 | 0.019218  |
| H | 4.995684  | 1.730696  | 1.476437  |
| H | 7.350292  | 0.996100  | 1.500592  |
| H | 6.440751  | -1.997422 | -1.444392 |
| H | 4.093617  | -1.253313 | -1.479836 |
| H | -4.995626 | -1.730737 | 1.476595  |
| H | -7.350234 | -0.996142 | 1.500864  |
| H | -6.440808 | 1.997463  | -1.444073 |
| H | -4.093675 | 1.253353  | -1.479630 |
| H | 8.089098  | -0.880310 | 0.044132  |
| H | -8.089096 | 0.880309  | 0.044484  |

Energies (0K) = -1379.10778535

Energies (0K) + ZPE = -1378.705536

Enthalpies (298K) = -1378.680931

Free Energies (298K) = -1378.759719

Cation radical

|   |           |           |           |
|---|-----------|-----------|-----------|
| C | -0.212102 | -4.534912 | -0.026516 |
| C | -1.287534 | -3.638646 | -0.013471 |
| C | -1.015862 | -2.279940 | 0.004130  |
| C | 0.311891  | -1.819200 | 0.009586  |
| C | 1.396826  | -2.724147 | -0.008170 |
| C | 1.108603  | -4.101763 | -0.024246 |
| C | 0.553424  | -0.435925 | 0.025779  |
| C | 1.857488  | 0.070641  | 0.026707  |
| C | 2.972800  | -0.806871 | 0.016965  |
| C | 2.708727  | -2.169360 | -0.002184 |
| C | -0.553426 | 0.435926  | 0.025765  |
| C | -1.857489 | -0.070641 | 0.026624  |
| C | -2.972801 | 0.806872  | 0.016855  |
| C | -2.708727 | 2.169362  | -0.002250 |

|                                     |           |           |           |
|-------------------------------------|-----------|-----------|-----------|
| C                                   | -1.396826 | 2.724149  | -0.008165 |
| C                                   | -0.311892 | 1.819201  | 0.009616  |
| C                                   | -1.108603 | 4.101765  | -0.024194 |
| C                                   | 0.212103  | 4.534914  | -0.026395 |
| C                                   | 1.287534  | 3.638648  | -0.013325 |
| C                                   | 1.015861  | 2.279941  | 0.004231  |
| O                                   | 2.061874  | 1.404081  | 0.013582  |
| O                                   | -2.061876 | -1.404079 | 0.013457  |
| C                                   | 4.366419  | -0.307382 | 0.004304  |
| C                                   | -4.366419 | 0.307381  | 0.004127  |
| C                                   | 5.295486  | -0.875485 | -0.876745 |
| C                                   | 6.618713  | -0.446111 | -0.882160 |
| C                                   | 7.032091  | 0.555361  | -0.006631 |
| C                                   | 6.114674  | 1.125557  | 0.873883  |
| C                                   | 4.790047  | 0.701503  | 0.879539  |
| C                                   | -5.295452 | 0.875499  | -0.876948 |
| C                                   | -6.618678 | 0.446122  | -0.882423 |
| C                                   | -7.032089 | -0.555367 | -0.006929 |
| C                                   | -6.114706 | -1.125576 | 0.873611  |
| C                                   | -4.790080 | -0.701520 | 0.879327  |
| H                                   | -0.422940 | -5.599370 | -0.039970 |
| H                                   | -2.314779 | -3.986230 | -0.017795 |
| H                                   | 1.920065  | -4.822811 | -0.036553 |
| H                                   | 3.551625  | -2.854682 | 0.004634  |
| H                                   | -3.551626 | 2.854683  | 0.004548  |
| H                                   | -1.920064 | 4.822813  | -0.036518 |
| H                                   | 0.422941  | 5.599373  | -0.039813 |
| H                                   | 2.314779  | 3.986232  | -0.017596 |
| H                                   | 4.974019  | -1.643675 | -1.575158 |
| H                                   | 7.325435  | -0.891590 | -1.576511 |
| H                                   | 6.431557  | 1.902206  | 1.564182  |
| H                                   | 4.087794  | 1.143196  | 1.579588  |
| H                                   | -4.973958 | 1.643702  | -1.575334 |
| H                                   | -7.325374 | 0.891612  | -1.576794 |
| H                                   | -6.431615 | -1.902238 | 1.563884  |
| H                                   | -4.087853 | -1.143224 | 1.579397  |
| H                                   | 8.065084  | 0.891598  | -0.010973 |
| H                                   | -8.065081 | -0.891605 | -0.011319 |
| Energies (0K) = -1378.99798232      |           |           |           |
| Energies (0K) + ZPE = -1378.590885  |           |           |           |
| Enthalpies (298K) = -1378.566815    |           |           |           |
| Free Energies (298K) = -1378.644014 |           |           |           |

#### 5d, R=4-<sup>t</sup>BuC<sub>6</sub>H<sub>4</sub>

Ground state

|   |           |           |           |
|---|-----------|-----------|-----------|
| C | -0.612322 | -4.511811 | -0.040923 |
| C | -1.605839 | -3.507318 | -0.027278 |

|   |           |           |           |
|---|-----------|-----------|-----------|
| C | -1.221651 | -2.186040 | -0.009706 |
| C | 0.150686  | -1.845760 | -0.005012 |
| C | 1.146877  | -2.852671 | -0.024237 |
| C | 0.730858  | -4.208034 | -0.039375 |
| C | 0.524715  | -0.488730 | 0.013239  |
| C | 1.847325  | -0.109301 | 0.014394  |
| C | 2.877612  | -1.089743 | 0.000369  |
| C | 2.499620  | -2.425078 | -0.019682 |
| C | -0.524718 | 0.488742  | 0.013229  |
| C | -1.847329 | 0.109313  | 0.014330  |
| C | -2.877615 | 1.089756  | 0.000283  |
| C | -2.499622 | 2.425090  | -0.019730 |
| C | -1.146878 | 2.852684  | -0.024228 |
| C | -0.150688 | 1.845773  | -0.004986 |
| C | -0.730859 | 4.208047  | -0.039330 |
| C | 0.612321  | 4.511824  | -0.040828 |
| C | 1.605837  | 3.507331  | -0.027164 |
| C | 1.221649  | 2.186053  | -0.009626 |
| O | 2.197467  | 1.217998  | 0.001804  |
| O | -2.197469 | -1.217986 | 0.001704  |
| C | 4.312278  | -0.723463 | -0.008517 |
| C | -4.312280 | 0.723474  | -0.008670 |
| C | 5.204194  | -1.392406 | -0.851848 |
| C | 6.563841  | -1.090614 | -0.849530 |
| C | 7.092230  | -0.108990 | -0.006356 |
| C | 6.190878  | 0.557030  | 0.837448  |
| C | 4.834291  | 0.263944  | 0.839170  |
| C | -5.204161 | 1.392436  | -0.852024 |
| C | -6.563806 | 1.090636  | -0.849778 |
| C | -7.092228 | 0.108985  | -0.006657 |
| C | -6.190912 | -0.557052 | 0.837173  |
| C | -4.834328 | -0.263957 | 0.838967  |
| C | -8.578013 | -0.253244 | 0.020189  |
| C | -9.396617 | 0.580915  | -0.968568 |
| C | -8.746898 | -1.737451 | -0.344782 |
| C | -9.136629 | -0.011706 | 1.432345  |
| C | 8.578018  | 0.253220  | 0.020578  |
| C | 9.396661  | -0.580913 | -0.968170 |
| C | 8.746942  | 1.737438  | -0.344326 |
| C | 9.136557  | 0.011619  | 1.432753  |
| H | -0.928491 | -5.551062 | -0.053644 |
| H | -2.660389 | -3.763487 | -0.030860 |
| H | 1.477400  | -4.997194 | -0.051212 |
| H | 3.278950  | -3.182567 | -0.010383 |
| H | -3.278952 | 3.182580  | -0.010447 |
| H | -1.477401 | 4.997207  | -0.051180 |
| H | 0.928490  | 5.551075  | -0.053521 |
| H | 2.660388  | 3.763499  | -0.030705 |
| H | 4.828475  | -2.149354 | -1.535810 |

|   |            |           |           |
|---|------------|-----------|-----------|
| H | 7.211847   | -1.634314 | -1.528998 |
| H | 6.553100   | 1.324443  | 1.516773  |
| H | 4.174361   | 0.798601  | 1.514959  |
| H | -4.828414  | 2.149404  | -1.535949 |
| H | -7.211784  | 1.634350  | -1.529262 |
| H | -6.553163  | -1.324486 | 1.516459  |
| H | -4.174427  | -0.798628 | 1.514773  |
| H | -10.449635 | 0.283647  | -0.912665 |
| H | -9.341943  | 1.651825  | -0.741609 |
| H | -9.064237  | 0.430667  | -2.002082 |
| H | -9.808306  | -2.012338 | -0.324056 |
| H | -8.218783  | -2.391917 | 0.356816  |
| H | -8.362362  | -1.939484 | -1.351016 |
| H | -9.037828  | 1.041839  | 1.717718  |
| H | -10.200441 | -0.275833 | 1.466400  |
| H | -8.618617  | -0.616011 | 2.184623  |
| H | 10.449680  | -0.283663 | -0.912199 |
| H | 9.341959   | -1.651831 | -0.741255 |
| H | 9.064337   | -0.430620 | -2.001694 |
| H | 9.808353   | 2.012309  | -0.323534 |
| H | 8.218800   | 2.391884  | 0.357270  |
| H | 8.362461   | 1.939515  | -1.350573 |
| H | 9.037726   | -1.041936 | 1.718081  |
| H | 10.200372  | 0.275728  | 1.466874  |
| H | 8.618515   | 0.615902  | 2.185028  |

Energies (0K) = -1693.30065835  
 Energies (0K) + ZPE = -1692.667558  
 Enthalpies (298K) = -1692.632292  
 Free Energies (298K) = -1692.733568

#### Triplet state

|   |           |           |           |
|---|-----------|-----------|-----------|
| C | 0.632468  | 4.512864  | -0.002862 |
| C | 1.618914  | 3.524565  | 0.004645  |
| C | 1.215753  | 2.190931  | 0.023141  |
| C | -0.136996 | 1.854663  | 0.035027  |
| C | -1.142085 | 2.851101  | 0.020287  |
| C | -0.723769 | 4.196093  | 0.004736  |
| C | -0.497229 | 0.473002  | 0.053028  |
| C | -1.878135 | 0.098886  | 0.051796  |
| C | -2.884968 | 1.060543  | 0.038846  |
| C | -2.501884 | 2.426504  | 0.024910  |
| C | 0.497231  | -0.472999 | 0.053017  |
| C | 1.878137  | -0.098883 | 0.051723  |
| C | 2.884969  | -1.060540 | 0.038747  |
| C | 2.501883  | -2.426502 | 0.024852  |
| C | 1.142085  | -2.851099 | 0.020291  |
| C | 0.136996  | -1.854661 | 0.035054  |
| C | 0.723768  | -4.196092 | 0.004780  |
| C | -0.632469 | -4.512862 | -0.002759 |

|   |           |           |           |
|---|-----------|-----------|-----------|
| C | -1.618914 | -3.524563 | 0.004770  |
| C | -1.215753 | -2.190928 | 0.023227  |
| O | -2.193866 | -1.232045 | 0.028642  |
| O | 2.193866  | 1.232047  | 0.028533  |
| C | -4.321974 | 0.708908  | 0.011833  |
| C | 4.321975  | -0.708908 | 0.011663  |
| C | -5.207537 | 1.430044  | -0.796634 |
| C | -6.568690 | 1.136720  | -0.822077 |
| C | -7.110109 | 0.112281  | -0.040280 |
| C | -6.218457 | -0.603377 | 0.772568  |
| C | -4.860447 | -0.317999 | 0.801788  |
| C | 5.207501  | -1.430068 | -0.796823 |
| C | 6.568654  | -1.136746 | -0.822335 |
| C | 7.110108  | -0.112285 | -0.040592 |
| C | 6.218493  | 0.603397  | 0.772275  |
| C | 4.860484  | 0.318021  | 0.801565  |
| C | 8.597733  | 0.243349  | -0.045467 |
| C | 9.403415  | -0.643903 | -0.997881 |
| C | 8.770205  | 1.705934  | -0.488359 |
| C | 9.169041  | 0.071988  | 1.371706  |
| C | -8.597734 | -0.243353 | -0.045078 |
| C | -9.403456 | 0.643863  | -0.997493 |
| C | -8.770226 | -1.705955 | -0.487905 |
| C | -9.168980 | -0.071935 | 1.372112  |
| H | 0.935448  | 5.555830  | -0.015946 |
| H | 2.675164  | 3.771772  | -0.003930 |
| H | -1.466630 | 4.988948  | -0.004140 |
| H | -3.280935 | 3.181980  | 0.049062  |
| H | 3.280935  | -3.181978 | 0.048987  |
| H | 1.466629  | -4.988946 | -0.004112 |
| H | -0.935450 | -5.555828 | -0.015814 |
| H | -2.675165 | -3.771770 | -0.003760 |
| H | -4.824575 | 2.223638  | -1.433466 |
| H | -7.208106 | 1.722229  | -1.474757 |
| H | -6.590458 | -1.403763 | 1.407455  |
| H | -4.211677 | -0.891169 | 1.456412  |
| H | 4.824511  | -2.223679 | -1.433616 |
| H | 7.208040  | -1.722275 | -1.475026 |
| H | 6.590523  | 1.403802  | 1.407122  |
| H | 4.211745  | 0.891211  | 1.456202  |
| H | 10.457936 | -0.347889 | -0.968504 |
| H | 9.347806  | -1.701526 | -0.715591 |
| H | 9.060248  | -0.545801 | -2.034136 |
| H | 9.832841  | 1.976985  | -0.490445 |
| H | 8.250128  | 2.398303  | 0.182133  |
| H | 8.378536  | 1.857464  | -1.500760 |
| H | 9.070156  | -0.965672 | 1.710414  |
| H | 10.233815 | 0.334235  | 1.383197  |
| H | 8.658966  | 0.714511  | 2.097223  |



|   |            |           |           |
|---|------------|-----------|-----------|
| H | -10.457976 | 0.347849  | -0.968062 |
| H | -9.347837  | 1.701496  | -0.715244 |
| H | -9.060331  | 0.545723  | -2.033758 |
| H | -9.832864  | -1.977003 | -0.489937 |
| H | -8.250125  | -2.398298 | 0.182595  |
| H | -8.378598  | -1.857526 | -1.500315 |
| H | -9.070083  | 0.965739  | 1.710774  |
| H | -10.233754 | -0.334183 | 1.383661  |
| H | -8.658872  | -0.714428 | 2.097633  |

Energies (0K) = -1693.23292330

Energies (0K) + ZPE = -1692.603500

Enthalpies (298K) = -1692.567872

Free Energies (298K) = -1692.670598

Cation radical

|   |           |           |           |
|---|-----------|-----------|-----------|
| C | 0.643708  | 4.493926  | -0.027201 |
| C | 1.629006  | 3.499237  | -0.016117 |
| C | 1.229171  | 2.172462  | 0.000978  |
| C | -0.136534 | 1.840509  | 0.007487  |
| C | -1.130352 | 2.844631  | -0.008546 |
| C | -0.712266 | 4.188385  | -0.023688 |
| C | -0.509299 | 0.486738  | 0.023482  |
| C | -1.855943 | 0.107631  | 0.023907  |
| C | -2.883520 | 1.087178  | 0.015445  |
| C | -2.489163 | 2.418318  | -0.000889 |
| C | 0.509302  | -0.486746 | 0.023470  |
| C | 1.855946  | -0.107639 | 0.023834  |
| C | 2.883523  | -1.087186 | 0.015348  |
| C | 2.489165  | -2.418326 | -0.000947 |
| C | 1.130354  | -2.844640 | -0.008542 |
| C | 0.136536  | -1.840517 | 0.007512  |
| C | 0.712267  | -4.188394 | -0.023645 |
| C | -0.643708 | -4.493934 | -0.027099 |
| C | -1.629004 | -3.499246 | -0.015994 |
| C | -1.229170 | -2.172470 | 0.001063  |
| O | -2.186668 | -1.200614 | 0.008803  |
| O | 2.186669  | 1.200606  | 0.008696  |
| C | -4.316968 | 0.724284  | 0.000293  |
| C | 4.316970  | -0.724292 | 0.000129  |
| C | -5.197819 | 1.395855  | -0.851938 |
| C | -6.556629 | 1.093888  | -0.859366 |
| C | -7.091178 | 0.113625  | -0.018099 |
| C | -6.198285 | -0.552439 | 0.834688  |
| C | -4.841789 | -0.261782 | 0.846982  |
| C | 5.197786  | -1.395885 | -0.852121 |
| C | 6.556594  | -1.093913 | -0.859618 |
| C | 7.091177  | -0.113623 | -0.018404 |
| C | 6.198319  | 0.552462  | 0.834404  |
| C | 4.841825  | 0.261799  | 0.846768  |

|   |            |           |           |
|---|------------|-----------|-----------|
| C | 8.577087   | 0.247085  | -0.002752 |
| C | 9.387038   | -0.586279 | -0.999179 |
| C | 8.742522   | 1.732001  | -0.366989 |
| C | 9.145442   | 0.002843  | 1.405197  |
| C | -8.577091  | -0.247068 | -0.002365 |
| C | -9.387081  | 0.586266  | -0.998785 |
| C | -8.742559  | -1.731997 | -0.366535 |
| C | -9.145376  | -0.002765 | 1.405602  |
| H | 0.954848   | 5.533570  | -0.040061 |
| H | 2.684675   | 3.747648  | -0.021523 |
| H | -1.451251  | 4.983515  | -0.034512 |
| H | -3.262484  | 3.181223  | 0.009669  |
| H | 3.262486   | -3.181231 | 0.009594  |
| H | 1.451252   | -4.983524 | -0.034483 |
| H | -0.954848  | -5.533579 | -0.039929 |
| H | -2.684674  | -3.747656 | -0.021354 |
| H | -4.816787  | 2.150419  | -1.535529 |
| H | -7.199112  | 1.636402  | -1.544502 |
| H | -6.566766  | -1.317426 | 1.512758  |
| H | -4.190525  | -0.793046 | 1.534084  |
| H | 4.816727   | -2.150470 | -1.535674 |
| H | 7.199050   | -1.636444 | -1.544767 |
| H | 6.566828   | 1.317470  | 1.512435  |
| H | 4.190589   | 0.793080  | 1.533884  |
| H | 10.440404  | -0.289462 | -0.950451 |
| H | 9.333853   | -1.657476 | -0.773320 |
| H | 9.047435   | -0.433704 | -2.029972 |
| H | 9.804279   | 2.005387  | -0.354885 |
| H | 8.221413   | 2.385889  | 0.340327  |
| H | 8.349716   | 1.935735  | -1.369620 |
| H | 9.047104   | -1.050738 | 1.690341  |
| H | 10.209849  | 0.264896  | 1.429989  |
| H | 8.635436   | 0.607831  | 2.162329  |
| H | -10.440447 | 0.289460  | -0.949997 |
| H | -9.333875  | 1.657470  | -0.772968 |
| H | -9.047527  | 0.433650  | -2.029589 |
| H | -9.804319  | -2.005371 | -0.354370 |
| H | -8.221425  | -2.385863 | 0.340782  |
| H | -8.349803  | -1.935774 | -1.369177 |
| H | -9.047013  | 1.050826  | 1.690700  |
| H | -10.209784 | -0.264807 | 1.430456  |
| H | -8.635339  | -0.607730 | 2.162733  |

Energies (0K) = -1693.12382254  
 Energies (0K) + ZPE = -1692.489881  
 Enthalpies (298K) = -1692.454676  
 Free Energies (298K) = -1692.556460

### 13. Comparison Tables

**Supplementary Table 9. Previous reports on catalyst loading (or catalyst residue) in polymers prepared by ATRP.<sup>a</sup>**

| Entry                              | Monomer | Catalyst/Initiator System                                                                                           | Catalyst Residue | Reaction Temp (°C) | Reference                                                 |
|------------------------------------|---------|---------------------------------------------------------------------------------------------------------------------|------------------|--------------------|-----------------------------------------------------------|
| 1                                  | MMA     | ODA <b>5d</b> /DBMM                                                                                                 | 0.05ppm-10ppm    | 25, Light          | This work                                                 |
| 2                                  | MMA     | core-substituted diaryl dihydrophenazine/DBMM                                                                       | 5-100ppm         | 25, Light          | <i>Macromolecules</i> <b>2019</b> , 52, 747-754           |
| 3                                  | MMA     | 4DP-IPN/DBMM                                                                                                        | 0.5 ppm-100ppm   | 25, Light          | <i>Nat. Catal.</i> <b>2018</b> , 1, 794-804               |
| 4                                  | MMA     | <i>fac</i> -Ir(ppy) <sub>3</sub> , EBPA, PEGMA                                                                      | <16 ppm          | 25, Light          | <i>Polym. Chem.</i> <b>2018</b> , 9, 584                  |
| 5                                  | MMA     | EBP/Ph-benzoPTZ                                                                                                     | 500-1000ppm      | 25, Light          | <i>Chem. Eur. J.</i> <b>2017</b> , 23, 5972-5977          |
| 6                                  | MMA     | 4CZ-IPN/EBP                                                                                                         | 5-40ppm          | 25, Light          | <i>Macromol. Rapid Commun.</i> <b>2017</b> , 38, 1600461  |
| 7                                  | MMA     | pyrene or anthracene/EBP                                                                                            | 100-30000ppm     | 25, Light          | <i>Macromolecules</i> <b>2016</b> , 49, 7785-7792         |
| 8                                  | MMA     | EBP/PMDETA/Eosin Y or Erythrosin B                                                                                  | 500ppm           | 25, Light          | <i>Polym. Chem.</i> <b>2016</b> , 7, 6094–6098            |
| 9                                  | MMA     | diphenyl dihydrophenazine/EBP                                                                                       | 1000ppm          | 25, Light          | <i>Science</i> <b>2016</b> , 352, 1082-1086               |
| Diffusion-regulated phase transfer |         |                                                                                                                     |                  |                    |                                                           |
| 10                                 | MMA     | catalyst(DRPTC) in an aqueous-organic biphasic system CuBr <sub>2</sub> /EBrPA/tris(2-pyridylmethyl)amine           | 6-26 ppm         | 75                 | <i>Macromol. Rap. Comm.</i> <b>2015</b> , 36, 538-546     |
| 11                                 | MMA     | PTH/EBP                                                                                                             | 1000ppm          | 25, Light          | <i>J. Am. Chem. Soc.</i> <b>2014</b> , 136, 16096-16101   |
| 12                                 | MMA     | <i>fac</i> -Ir(ppy) <sub>3</sub> /EBP                                                                               | 50ppm            | 25, Light          | <i>Angew. Chem. Int. Ed.</i> <b>2012</b> , 51, 8850-8853  |
| 13                                 | MMA     | CuBr/4,4'-bis(RfCH <sub>2</sub> OCH <sub>2</sub> )-2,2'-bpy complexes                                               | 19.3 ppm         | 90                 | <i>J. Appl. Polym. sci.</i> <b>2008</b> , 110, 2531       |
| 14                                 | MMA     | Ionic liquid catalyst TEDETA anchored on an imidazolium-based ionic liquid                                          | 50-100 ppm       | 60                 | <i>Macromolecules</i> <b>2005</b> , 38, 5921              |
| 15                                 | MMA     | Silica supported catalyst, Cabosil-CuBr/dMBpy                                                                       | 37 ppm           | 90                 | <i>Journal of catalysis</i> , 232, <b>2005</b> , 276-294  |
| 16                                 | MMA     | Thymine anchored on silica gel support and 2,6-diaminopyridine functionalized with a catalyst, CuBr(TEDETA) complex | 39 ppm           | 90                 | <i>J. Polymer Science Part A.</i> <b>2004</b> , 42, 22-30 |

|    |                   |                                                                                                                         |             |        |                                                       |
|----|-------------------|-------------------------------------------------------------------------------------------------------------------------|-------------|--------|-------------------------------------------------------|
| 17 | MMA               | Crosslinked diphosphinopolystyrene supported<br>NiBr <sub>2</sub> (TPP) <sub>2</sub> /EBriB, TPP ligand                 | 34 ppm      | 90     | <i>Chem. Commun.</i> <b>2004</b> , 640-641            |
| 18 | MMA               | Tris(2(dioctadecylamino)ethyl)amine<br>CuBr/EBriB                                                                       | 200 ppm     | 70     | <i>J. Am. Chem. Soc.</i> <b>2004</b> , 126, 7764-7765 |
| 19 | MMA, St<br>DMAEMA | JandJael ligand, CuBr/EBriB                                                                                             | 331-463 ppm | 60-100 | <i>Macromolecules</i> <b>2003</b> , 36, 3111-3114     |
| 20 | MMA               | CuBr/Precipitation ligands/EBriB                                                                                        | <70 ppm     | 90     | <i>Macromolecules</i> <b>2002</b> , 35, 4849-4851     |
| 21 | MMA               | CuBr/PE25-PEG4-TEDETA/MBPA                                                                                              | 8-35 ppm    | 80     | <i>Macromolecules</i> <b>2001</b> , 34, 8603-8609     |
| 22 | MMA, BA           | Dual immobilized/soluble hybrid catalyst<br>system, CuBr/dNbpy, CuBr/PMDETA, and<br>CuBr/Me6TREN                        | 15 ppm      | 90     | <i>Macromolecules</i> <b>2001</b> , 34, 5099-5102     |
| 23 | MMA and MA        | The new two component catalyst system<br>CuBr/PS-bpy and a soluble catalyst,<br>CuBr <sub>2</sub> /Me <sub>6</sub> TREN | 20 ppm      | 80     | <i>Macromolecules</i> <b>2001</b> , 34, 5099          |
| 24 | MMA               | Pentakis-N-<br>(4,4,5,5,6,6,7,7,8,8,9,9,10,10,11,11,11-<br>heptadecafluoroundecyl)-1,4,7-triazaheptane,<br>CuBr, EBriB  | 880 ppm     | 90     | <i>J. Am. Chem. Soc.</i> <b>2000</b> , 122, 1542-1543 |
| 25 | MMA               | Amphiphilic block copolymer with bipyridine<br>ligands ML1/CuBr/EBriB                                                   | 100 ppm     | 60     |                                                       |
| 26 | MMA               | 3-Aminopropyl-functionalized silica complexed<br>with RuCl <sub>2</sub> (PPh <sub>3</sub> ) <sub>3</sub> /EBriB         | 1000 ppm    | 90     | <i>Macromolecules</i> <b>1999</b> , 32, 4769-4775     |
| 27 | MMA               | Crosslinked polystyrene Merrifield resin<br>supported catalysts, CuBr-s-TREN/EBPA                                       | 120 ppm     | 90     | <i>Macromolecules</i> <b>1999</b> , 32, 2941-2947     |

<sup>a</sup> The values with metal catalysts before 2017 were summarized according to the Supplementary Table 7 in *Nat. Catal.* **1**, 794-804 (2018).<sup>5</sup>

**Supplementary Table 10. Comparison with other OPCs in O-ATRP**

|                                                                                                                | This work                                                                         | Science 352, 1082 (2016)                                                          | Macro. Rapid Commun. 38, 1600461 (2017)                                           | Nat. Catal. 1, 794 (2018)                                                          | Macromolecules 52, 747 (2019)                                                       | Angew. Chem. Int. Ed. 59, 3209 (2020)                                               |
|----------------------------------------------------------------------------------------------------------------|-----------------------------------------------------------------------------------|-----------------------------------------------------------------------------------|-----------------------------------------------------------------------------------|------------------------------------------------------------------------------------|-------------------------------------------------------------------------------------|-------------------------------------------------------------------------------------|
| <b>The best catalyst (framework)</b>                                                                           | 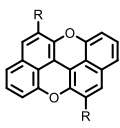 |  |  |  |  |  |
| <b>Structural character</b>                                                                                    | <i>O</i> -                                                                        | <i>N</i> -                                                                        | <i>N</i> -                                                                        | <i>N</i> -                                                                         | <i>N</i> -                                                                          | <i>N</i> -                                                                          |
| <b>Absorption maximum <math>\lambda_{\max}</math></b>                                                          | ~450 nm visible light                                                             | < 400 nm in ultraviolet                                                           | < 400 nm in ultraviolet                                                           | < 400 nm in ultraviolet                                                            | < 400 nm in ultraviolet                                                             | < 400 nm in ultraviolet                                                             |
| <b>Design</b>                                                                                                  | New principle Non-CT                                                              | Charge Transfer (CT)                                                              | Charge Transfer (CT)                                                              | Charge Transfer (CT)                                                               | Charge Transfer (CT)                                                                | Charge Transfer (CT)                                                                |
| <b><math>E^0</math> (PC<sup>•+</sup>/<sup>+</sup>PC<sup>•</sup>)<br/><math>E^0</math> (PC<sup>•+</sup>/PC)</b> | -1.84 V<br>+0.80 V                                                                | -1.80 V<br>+0.29 V                                                                | /                                                                                 | -1.41 V<br>+1.01 V                                                                 | -1.84 V<br>+0.38 V                                                                  | -1.73 V<br>+0.71 V                                                                  |
| <b>Cat. loading for <math>\bar{D}</math> &lt; 1.20</b>                                                         | 10 ppm                                                                            | 1000 ppm<br>33.8% conv.                                                           | Not reached<br>$\bar{D}$ > 1.50                                                   | Not reached<br>$\bar{D}$ > 1.37                                                    | 100 ppm*                                                                            | /                                                                                   |
| <b>Lowest cat. loading</b>                                                                                     | 0.05 ppm                                                                          | 200 ppm                                                                           | 15 ppm                                                                            | 0.5 ppm                                                                            | 5 ppm                                                                               | /                                                                                   |
| <b>Cat. loading (sunlight)</b>                                                                                 | 10 ppm<br>51% conv/7h                                                             | 1000 ppm<br>34% conv/7h                                                           | /                                                                                 | /                                                                                  | /                                                                                   | /                                                                                   |
| <b>Control exp. w/o initiator</b>                                                                              | <5% conv.<br>with 500 ppm cat                                                     | /                                                                                 | 41.6% conv<br>with 500 ppm cat.                                                   | /                                                                                  | /                                                                                   | /                                                                                   |
| <b>Results for the polymerization of challenging monomers (with the best catalyst shown above)</b>             |                                                                                   |                                                                                   |                                                                                   |                                                                                    |                                                                                     |                                                                                     |
| <b>Styrene</b>                                                                                                 | $\bar{D}$ 2.13/10 ppm<br>$\bar{D}$ 1.99/50 ppm                                    | 0%conv/1000ppm                                                                    | /                                                                                 | /                                                                                  | 0% conv/50 ppm<br>$\bar{D}$ 2.41/500 ppm†                                           | /                                                                                   |
| <b><i>n</i>-Butyl acrylate</b>                                                                                 | $\bar{D}$ 1.37/10 ppm<br>$\bar{D}$ 1.11/1000 pmm                                  | $\bar{D}$ 1.62/1000 ppm                                                           | /                                                                                 | /                                                                                  | $\bar{D}$ 2.34/500 ppm                                                              | $\bar{D}$ 2.13/100 pmm<br>$\bar{D}$ 1.53/1000 pmm                                   |

-The results summarized here were from polymerizations typically carried out in batch at a  $[MMA]_0/[Initiator]_0$  ratio of 100:1 except that in *Nat. Catal.* (200:1).<sup>5</sup> Dispersity were determined by GPC with PMMA standards unless otherwise specified. “/” means not reported or not applicable. cat. = catalyst. exp. = experiment.  $\lambda_{\max}$ : only considering the absorption profile above 310 nm.  $\bar{D}$  values in purple were determined by GPC coupled with MALS. \* $\bar{D}$  1.09 by GPC(PMMA) equal to  $\bar{D}$  ~1.20 by GPC(MALS) is employed. † With catalyst **3a** rather than the best catalyst **3c** in ATRP of MMA.

## 14. References

1. Allen, R. D., Long, T. E. & McGrath, J. E. Preparation of high purity, anionic polymerization grade alkyl methacrylate monomers. *Polym. Bull.*, **15**, 127–134 (1986).
2. Kamei, T., Uryu, M. & Shimada, T. Cu-catalyzed aerobic oxidative C–H/C–O cyclization of 2,2'-binaphthols: practical synthesis of PXX derivatives. *Org. Lett.* **19**, 2714–2717 (2017).
3. Treat, N. J., Sprafke, H., Kramer, J. W., Clark, P. G., Read de Alaniz, J., Fors, B. P. & Hawker, C. J. Metal-free atom transfer radical polymerization. *J. Am. Chem. Soc.* **136**, 16096–16101 (2014).
4. Kelly, C. P., Cramer, C. J. & Truhlar, D. G. Single-ion solvation free energies and the normal hydrogen electrode potential in methanol, acetonitrile, and dimethyl sulfoxide. *J. Phys. Chem. B* **111**, 408–422 (2007).
5. Singh, V. K., Yu, C., Badgujar, S., Kim, Y., Kwon, Y., Kim, D., Lee, J., Akhter, T., Thangavel, G., Park, L. S., Lee, J., Nandajan, P. C., Wannemacher, R., Milián-Medina, B., Lüer, L., Kim, K. S., Gierschner, J. & Kwon, M. S. Highly efficient organic photocatalysts discovered via a computer-aided-design strategy for visible-light-driven atom transfer radical polymerization. *Nat. Catal.* **1**, 794–804 (2018).
6. Liu, D., Dai, L., Lin, X., Chen, J.-F., Zhang, J., Feng, X., Müllen, K., Zhu, X. & Dai, S. Chemical Approaches to Carbon-Based Metal-Free Catalysts, *Adv. Mater.* **31**, 1804863 (2019).
